# Supplementary material
Source: bioRxiv or medRxiv preprint supplement (https://www.medrxiv.org/highwire/filestream/93513/field_highwire_adjunct_files/0/2020.08.17.20174821-1.pdf)
Supplement: Supplementary file [file 2020.08.17.20174821-1.pdf]

**Quantifying the efficiency of non-pharmaceutical  
interventions on SARS-COV-2 transmission in Europe**

**Supplementary materials**

## Section S1. Description of each NPI

| Name                | Description                                                                                                                                                                        |
|---------------------|------------------------------------------------------------------------------------------------------------------------------------------------------------------------------------|
| StayHomeOrder       | Stay-at-home orders for the general population (these are enforced and also referred to as 'lockdown')                                                                             |
| StayHomeGen         | Stay-at-home recommendations for the general population (which are voluntary or not enforced)                                                                                      |
| StayHomeRiskG       | Stay-at-home recommendations for risk groups or vulnerable populations (such as the elderly, people with underlying health conditions, physically disabled people, etc.)           |
| ClosDaycare         | Closure of educational institutions: daycare or nursery                                                                                                                            |
| ClosPrim            | Closure of educational institutions: primary schools.                                                                                                                              |
| ClosSec             | Closure of educational institutions: secondary schools.                                                                                                                            |
| ClosHigh            | Closure of educational institutions: higher education.                                                                                                                             |
| MassGatherAll       | Interventions are in place to limit mass/public gatherings (limit of 1000 or less individuals allowed).                                                                            |
| ClosPubAny          | Closure of public spaces of any kind (including restaurants, entertainment venues, non-essential shops, partial or full closure of public transport, gyms and sport centers, etc). |
| MasksVoluntary      | Protective mask use in public spaces/transport on voluntary basis (general recommendation not enforced)                                                                            |
| MasksMandatory      | Protective mask use in public spaces/transport on mandatory basis (enforced by law)                                                                                                |
| TeleworkingClosures | Teleworking recommendation or workplace closures                                                                                                                                   |

|                      |                                                                                                                                                                                                              |
|----------------------|--------------------------------------------------------------------------------------------------------------------------------------------------------------------------------------------------------------|
| StayHomeOrderPartial | Stay-at-home orders for the general population (these are enforced and also referred to as ‘lockdown’) – partially relaxed measure                                                                           |
| StayHomeGenPartial   | Stay-at-home recommendations for the general population (which are voluntary or not enforced) – partially relaxed measure                                                                                    |
| StayHomeRiskGPartial | Stay-at-home recommendations for risk groups or vulnerable populations (such as the elderly, people with underlying health conditions, physically disabled people, etc.) – partially relaxed measure         |
| ClosDaycarePartial   | Closure of educational institutions: daycare or nursery – partially relaxed measure                                                                                                                          |
| ClosPrimPartial      | Closure of educational institutions: primary schools – partially relaxed measure                                                                                                                             |
| ClosSecPartial       | Closure of educational institutions: secondary schools – partially relaxed measure                                                                                                                           |
| ClosHighPartial      | Closure of educational institutions: higher education – partially relaxed measure                                                                                                                            |
| MassGatherAllPartial | Interventions are in place to limit mass/public gatherings (with a specific limit of <1000 individuals, or less) – partially relaxed measure                                                                 |
| ClosPubAnyPartial    | Closure of public spaces of any kind (including restaurants, entertainment venues, non-essential shops, partial or full closure of public transport, gyms and sport centers etc) – partially relaxed measure |

|                            |                                                                                                                                     |
|----------------------------|-------------------------------------------------------------------------------------------------------------------------------------|
| MasksVoluntaryPartial      | Protective mask use in public spaces/transport on voluntary basis (general recommendation not enforced) – partially relaxed measure |
| MasksMandatoryPartial      | Protective mask use in public spaces/transport on mandatory basis (enforced by law) – partially relaxed measure                     |
| TeleworkingClosuresPartial | Teleworking recommendation or workplace closures – partially relaxed measure                                                        |

**Section S2. Estimations for each country are reported (dynamics of cases report and efficacies estimation).**

Austria:

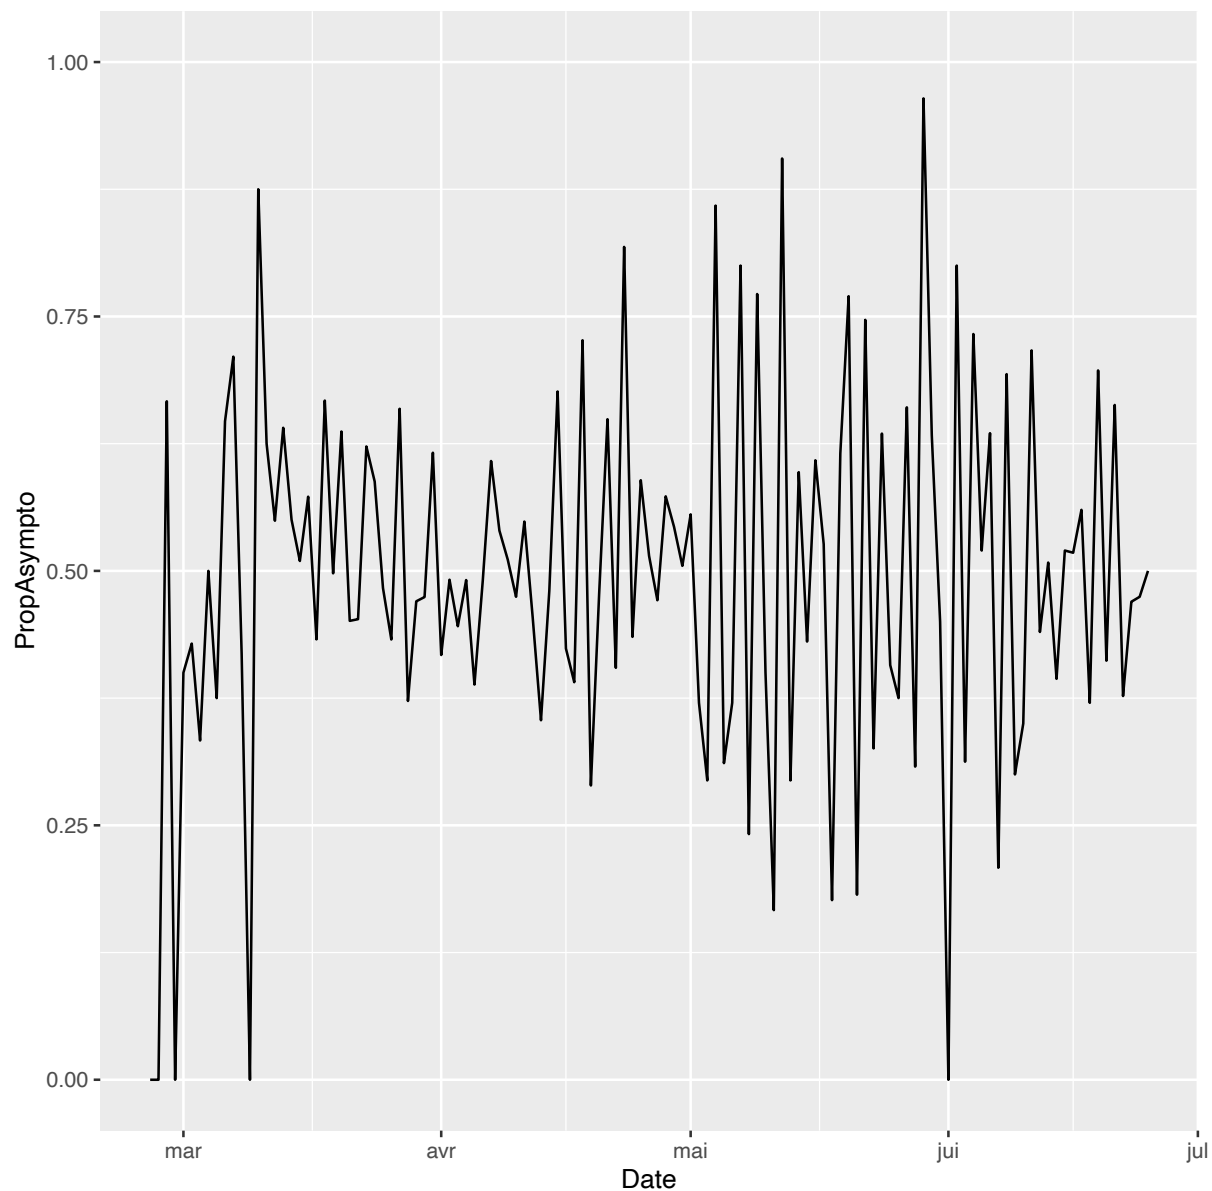

Efficiency of each public health responses:

|                                                                                                                                        | X2.5.      | X97.5.     | start | end |
|----------------------------------------------------------------------------------------------------------------------------------------|------------|------------|-------|-----|
| StayHomeGen MassGatherAll TeleworkingClosures                                                                                          | 0.03088063 | 0.03527421 | 14    | 20  |
| StayHomeOrder ClosDaycare ClosPrim ClosSec ClosHigh MassGather50<br>MassGatherAll ClosPubAny TeleworkingClosures                       | 0.44423    | 0.5255442  | 20    | 35  |
| StayHomeOrder ClosDaycare ClosPrim ClosSec ClosHigh MassGather50<br>MassGatherAll ClosPubAny MasksVoluntary TeleworkingClosures        | 0.895818   | 0.9092797  | 35    | 49  |
| StayHomeOrder ClosDaycare ClosPrim ClosSec ClosHigh MassGather50<br>MassGatherAll MasksMandatory TeleworkingClosures ClosPubAnyPartial | 0.8695459  | 0.8851971  | 49    | 69  |
| ClosPrim ClosHigh MassGather50 MassGatherAll MasksMandatory<br>TeleworkingClosures ClosSecPartial ClosPubAnyPartial                    | 0.7553109  | 0.7629522  | 69    | 84  |

|                                                                                                                    |           |           |     |     |
|--------------------------------------------------------------------------------------------------------------------|-----------|-----------|-----|-----|
| <b>ClosHigh MassGather50 MassGatherAll MasksMandatory<br/>TeleworkingClosures ClosSecPartial ClosPubAnyPartial</b> | 0.8329815 | 0.8376575 | 84  | 95  |
| <b>ClosHigh MassGatherAll MasksMandatory TeleworkingClosures<br/>ClosSecPartial</b>                                | 0.8034357 | 0.8957193 | 95  | 100 |
| <b>ClosHigh MassGatherAll MasksMandatory TeleworkingClosures</b>                                                   | 0.7921349 | 0.8534398 | 100 | 111 |
| <b>ClosHigh MassGatherAll TeleworkingClosures MasksMandatoryPartial</b>                                            | 0.2327604 | 0.3127261 | 111 | 121 |

Belgium:

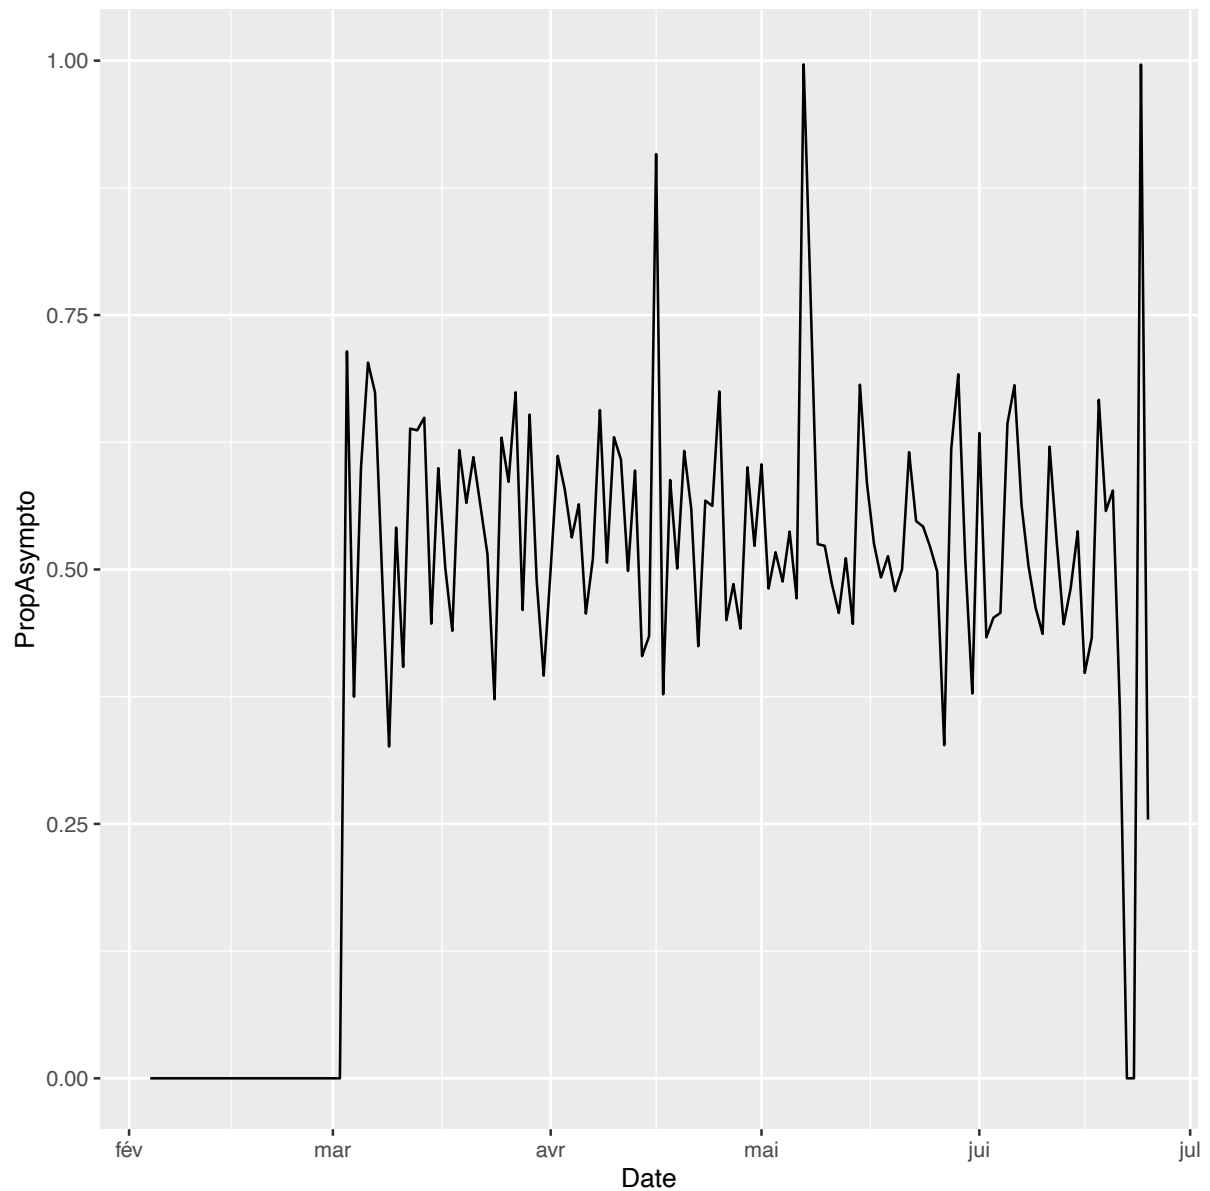

|                                                                                                                                      | X2.5.       | X97.5.     | start | end |
|--------------------------------------------------------------------------------------------------------------------------------------|-------------|------------|-------|-----|
| <b>ClosPrim ClosSec ClosHigh MassGatherAll ClosPubAny TeleworkingClosuresPartial</b>                                                 | 0.005786201 | 0.07894558 | 38    | 44  |
| <b>StayHomeOrder ClosPrim ClosSec ClosHigh MassGatherAll ClosPubAny TeleworkingClosuresPartial</b>                                   | 0.4373201   | 0.5051947  | 44    | 90  |
| <b>StayHomeOrder ClosDaycare ClosPrim ClosSec ClosHigh MassGatherAll MasksMandatory ClosPubAnyPartial TeleworkingClosuresPartial</b> | 0.8271692   | 0.953291   | 90    | 98  |
| <b>ClosDaycare ClosPrim ClosSec ClosHigh MassGatherAll MasksMandatory ClosPubAnyPartial TeleworkingClosuresPartial</b>               | 0.706344    | 0.8694659  | 98    | 105 |
| <b>ClosDaycare ClosHigh MassGatherAll MasksMandatory ClosPrimPartial ClosSecPartial ClosPubAnyPartial TeleworkingClosuresPartial</b> | 0.7048012   | 0.8558884  | 105   | 121 |
| <b>ClosHigh MassGatherAll MasksMandatory ClosPrimPartial ClosSecPartial ClosPubAnyPartial TeleworkingClosuresPartial</b>             | 0.6963528   | 0.7909758  | 121   | 127 |
| <b>ClosHigh MassGatherAll MasksMandatory ClosSecPartial ClosPubAnyPartial TeleworkingClosuresPartial</b>                             | 0.6517089   | 0.7900911  | 127   | 143 |

Bulgaria

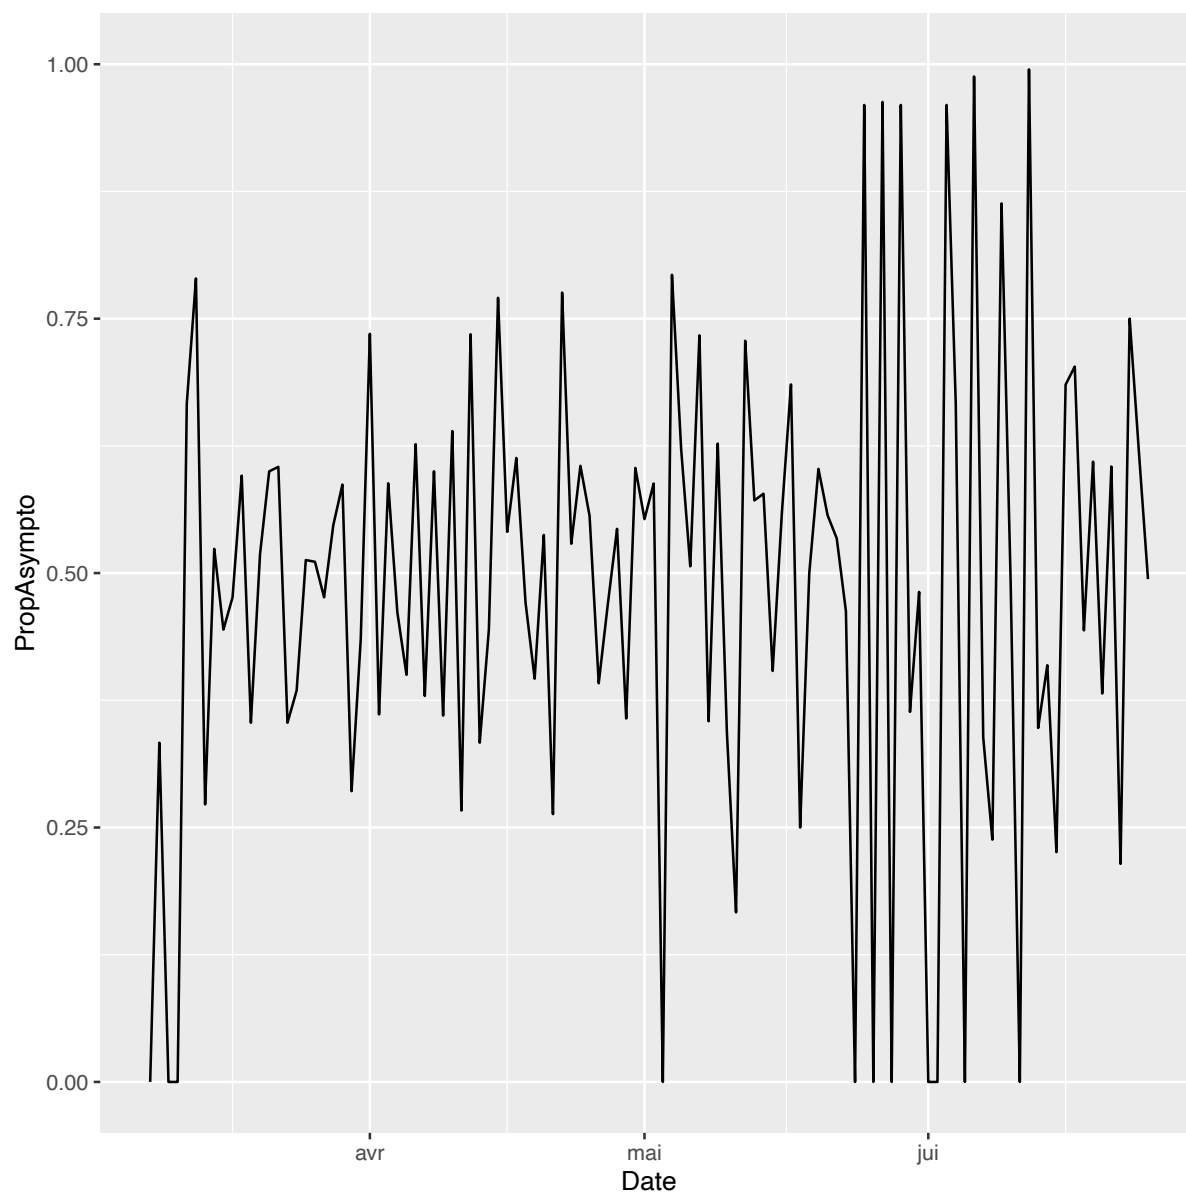

|                                                                                                                                                         | X2.5.      | X97.5.    | start | end |
|---------------------------------------------------------------------------------------------------------------------------------------------------------|------------|-----------|-------|-----|
| ClosDaycare ClosPrim ClosSec ClosHigh MassGather50 MassGatherAll<br>ClosPubAny TeleworkingClosures                                                      | 0.02697126 | 0.1510168 | 5     | 10  |
| StayHomeRiskG ClosDaycare ClosPrim ClosSec ClosHigh MassGather50<br>MassGatherAll ClosPubAny TeleworkingClosures                                        | 0.4765093  | 0.5517748 | 10    | 36  |
| StayHomeRiskG ClosDaycare ClosPrim ClosSec ClosHigh MassGather50<br>MassGatherAll ClosPubAny MasksMandatory TeleworkingClosures                         | 0.6745347  | 0.7214923 | 36    | 74  |
| StayHomeRiskG ClosDaycare ClosPrim ClosSec ClosHigh MassGather50<br>MassGatherAll MasksMandatory TeleworkingClosures ClosPubAnyPartial                  | 0.8426043  | 0.9361161 | 74    | 79  |
| StayHomeRiskG ClosPrim ClosSec ClosHigh MassGather50<br>MasksMandatory TeleworkingClosures ClosDaycarePartial<br>MassGatherAllPartial ClosPubAnyPartial | 0.8136222  | 0.897434  | 79    | 86  |



|                                                                                                                                                                           |           |           |     |     |
|---------------------------------------------------------------------------------------------------------------------------------------------------------------------------|-----------|-----------|-----|-----|
| <b>StayHomeRiskG ClosPrim ClosSec MassGather50 MasksMandatory<br/> TeleworkingClosures ClosDaycarePartial ClosHighPartial<br/> MassGatherAllPartial ClosPubAnyPartial</b> | 0.3094084 | 0.4177233 | 86  | 100 |
| <b>StayHomeRiskG ClosPrim ClosSec MassGather50 TeleworkingClosures<br/> ClosHighPartial MassGatherAllPartial ClosPubAnyPartial<br/> MasksMandatoryPartial</b>             | 0.4216705 | 0.4915043 | 100 | 110 |

Croatia:

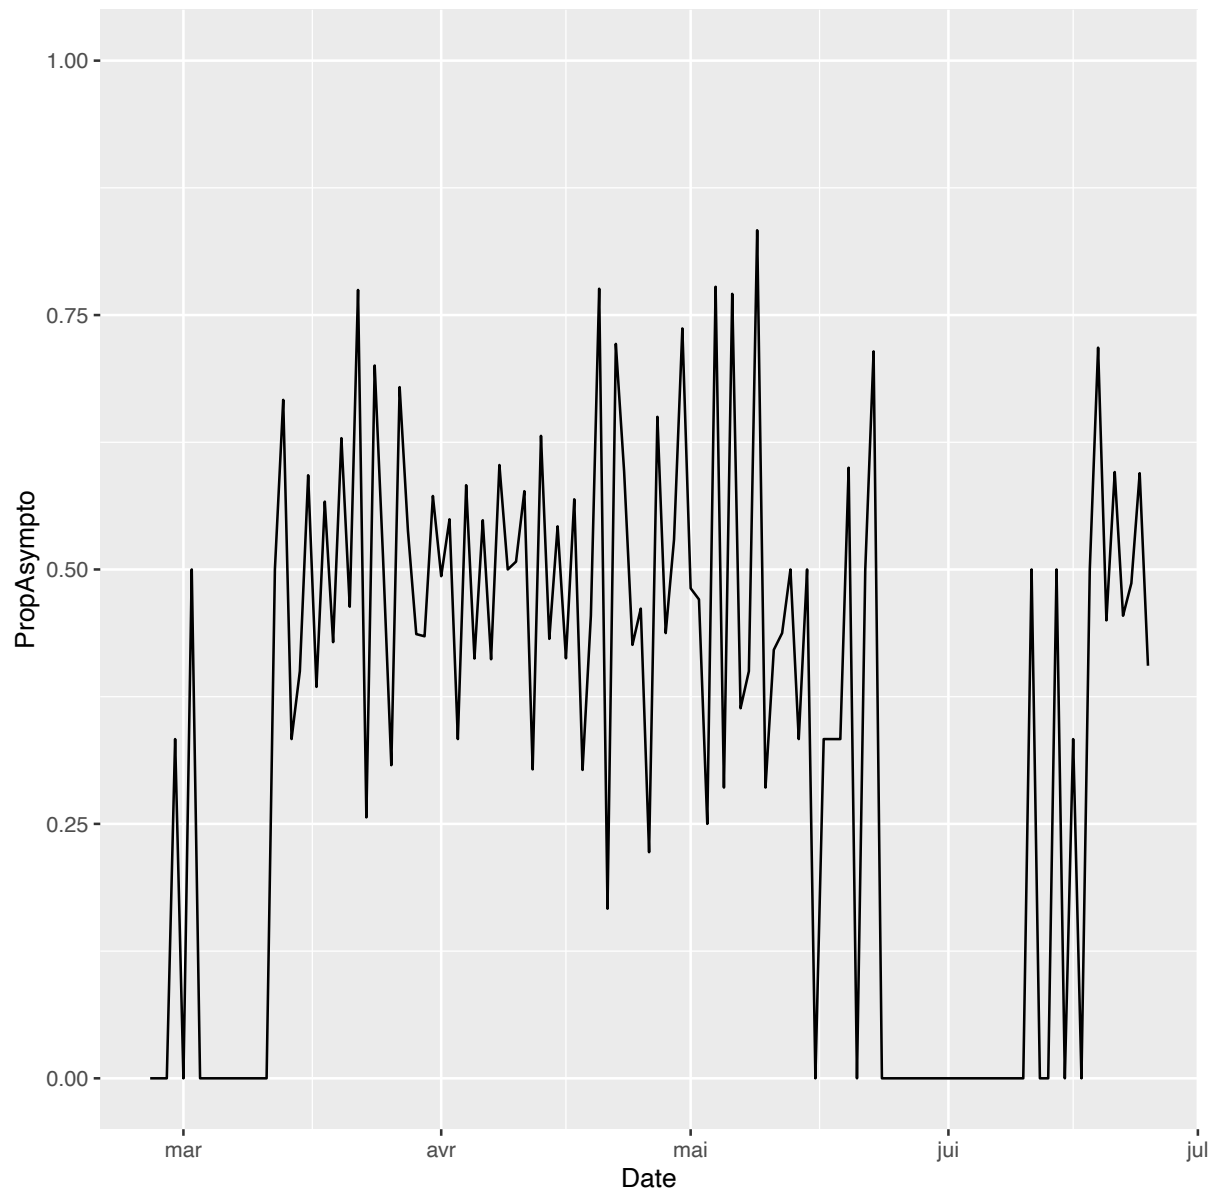

|                                                                                                                                                 | X2.5.        | X97.5.     | start | end |
|-------------------------------------------------------------------------------------------------------------------------------------------------|--------------|------------|-------|-----|
| <b>StayHomeRiskG</b>                                                                                                                            | 0.0004829292 | 0.04995205 | 7     | 22  |
| <b>StayHomeGen StayHomeRiskG ClosDaycare ClosPrim ClosSec ClosHigh MassGather50 MassGatherAll ClosPubAny TeleworkingClosures</b>                | 0.5865458    | 0.64935    | 22    | 59  |
| <b>StayHomeGen StayHomeRiskG ClosDaycare ClosPrim ClosSec ClosHigh MassGather50 MassGatherAll ClosPubAny MasksVoluntary TeleworkingClosures</b> | 0.841691     | 0.9063451  | 59    | 77  |
| <b>StayHomeGen StayHomeRiskG ClosSec ClosHigh MassGather50 MassGatherAll ClosPubAny MasksVoluntary ClosPrimPartial</b>                          | 0.9165968    | 0.9939629  | 77    | 84  |
| <b>StayHomeGen StayHomeRiskG ClosSec ClosHigh MassGather50 MassGatherAll MasksVoluntary ClosPrimPartial</b>                                     | 0.9116987    | 0.9856363  | 84    | 91  |
| <b>StayHomeGen StayHomeRiskG ClosSec ClosHigh MassGather50 MassGatherAll MasksVoluntary</b>                                                     | 0.3701547    | 0.4765659  | 91    | 121 |

Cyprus

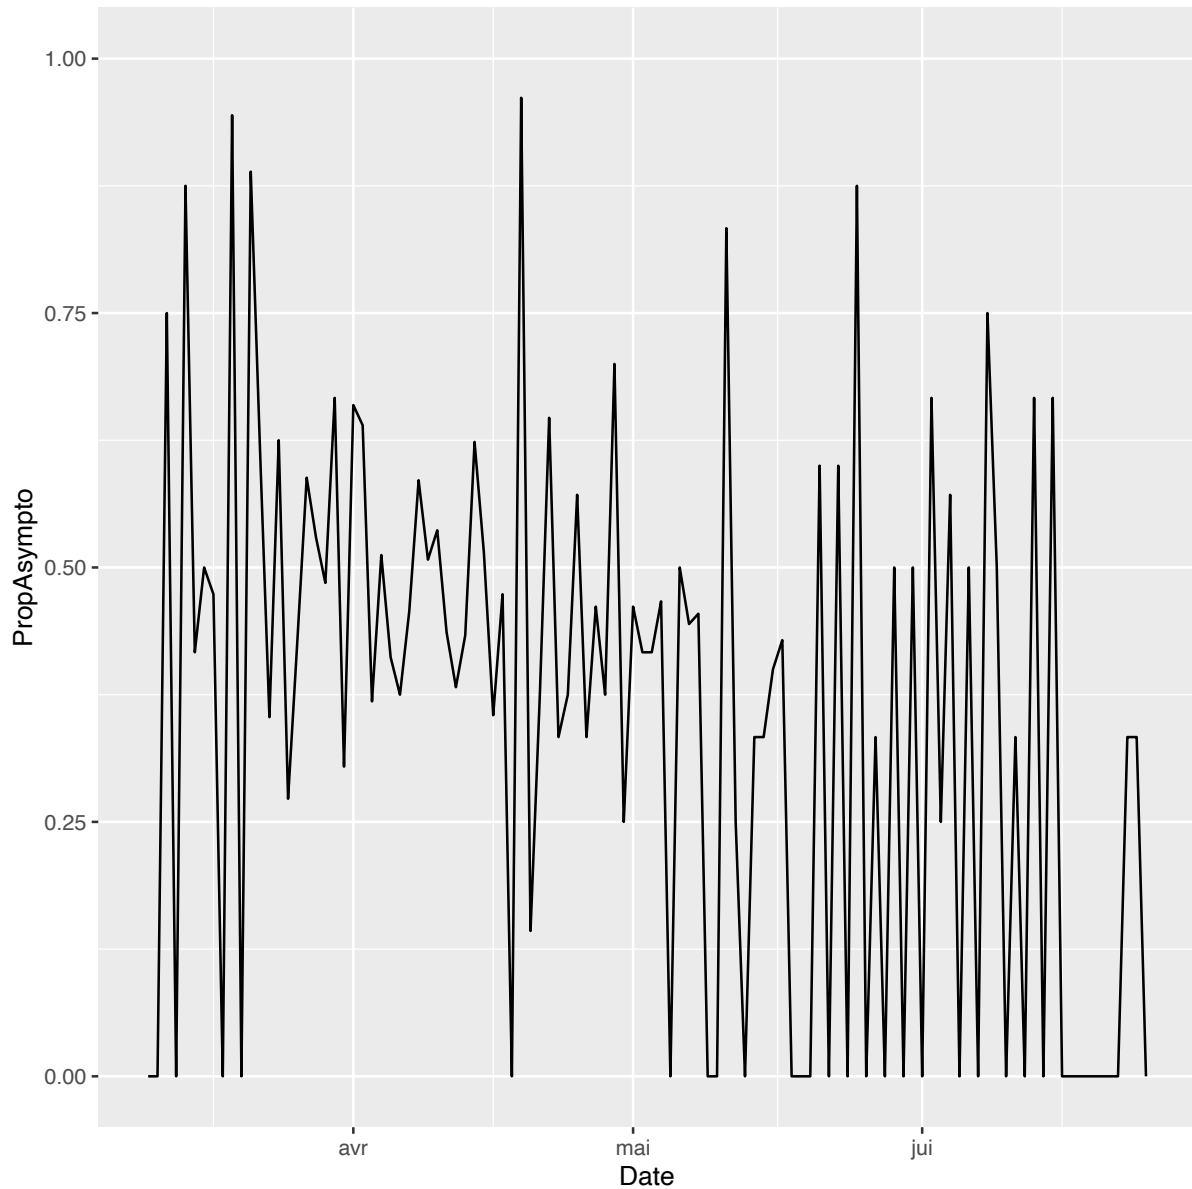

|                                                                                                                                                                 | X2.5.      | X97.5.       | start | end |
|-----------------------------------------------------------------------------------------------------------------------------------------------------------------|------------|--------------|-------|-----|
| <b>ClosDaycare ClosPrim ClosSec ClosHigh MassGather50 MassGatherAll ClosPubAny TeleworkingClosures</b>                                                          | 0.03393822 | 0.22623736   | 6     | 15  |
| <b>StayHomeOrder ClosDaycare ClosPrim ClosSec ClosHigh MassGather50 MassGatherAll ClosPubAny TeleworkingClosures</b>                                            | 0.5823432  | 0.6900369575 | 15    | 37  |
| <b>StayHomeOrder ClosDaycare ClosPrim ClosSec ClosHigh MassGather50 MassGatherAll ClosPubAny TeleworkingClosuresPartial</b>                                     | 0.8283525  | 0.9146044    | 37    | 56  |
| <b>ClosDaycare ClosPrim ClosSec ClosHigh MassGather50 MasksMandatory StayHomeOrderPartial MassGatherAllPartial ClosPubAnyPartial TeleworkingClosuresPartial</b> | 0.6617372  | 0.8989649    | 56    | 64  |
| <b>ClosDaycare ClosPrim MassGather50 MasksMandatory StayHomeOrderPartial ClosSecPartial MassGatherAllPartial ClosPubAnyPartial TeleworkingClosuresPartial</b>   | 0.6409638  | 0.91044497   | 64    | 74  |
| <b>ClosDaycare MassGather50 MasksMandatory MassGatherAllPartial ClosPubAnyPartial TeleworkingClosuresPartial</b>                                                | 0.6260668  | 0.798909     | 74    | 93  |

|                                                                                                          |           |           |    |     |
|----------------------------------------------------------------------------------------------------------|-----------|-----------|----|-----|
| <b>MassGather50 MasksMandatory MassGatherAllPartial ClosPubAnyPartial<br/>TeleworkingClosuresPartial</b> | 0.6618916 | 0.9315759 | 93 | 108 |
|----------------------------------------------------------------------------------------------------------|-----------|-----------|----|-----|

Czechia:

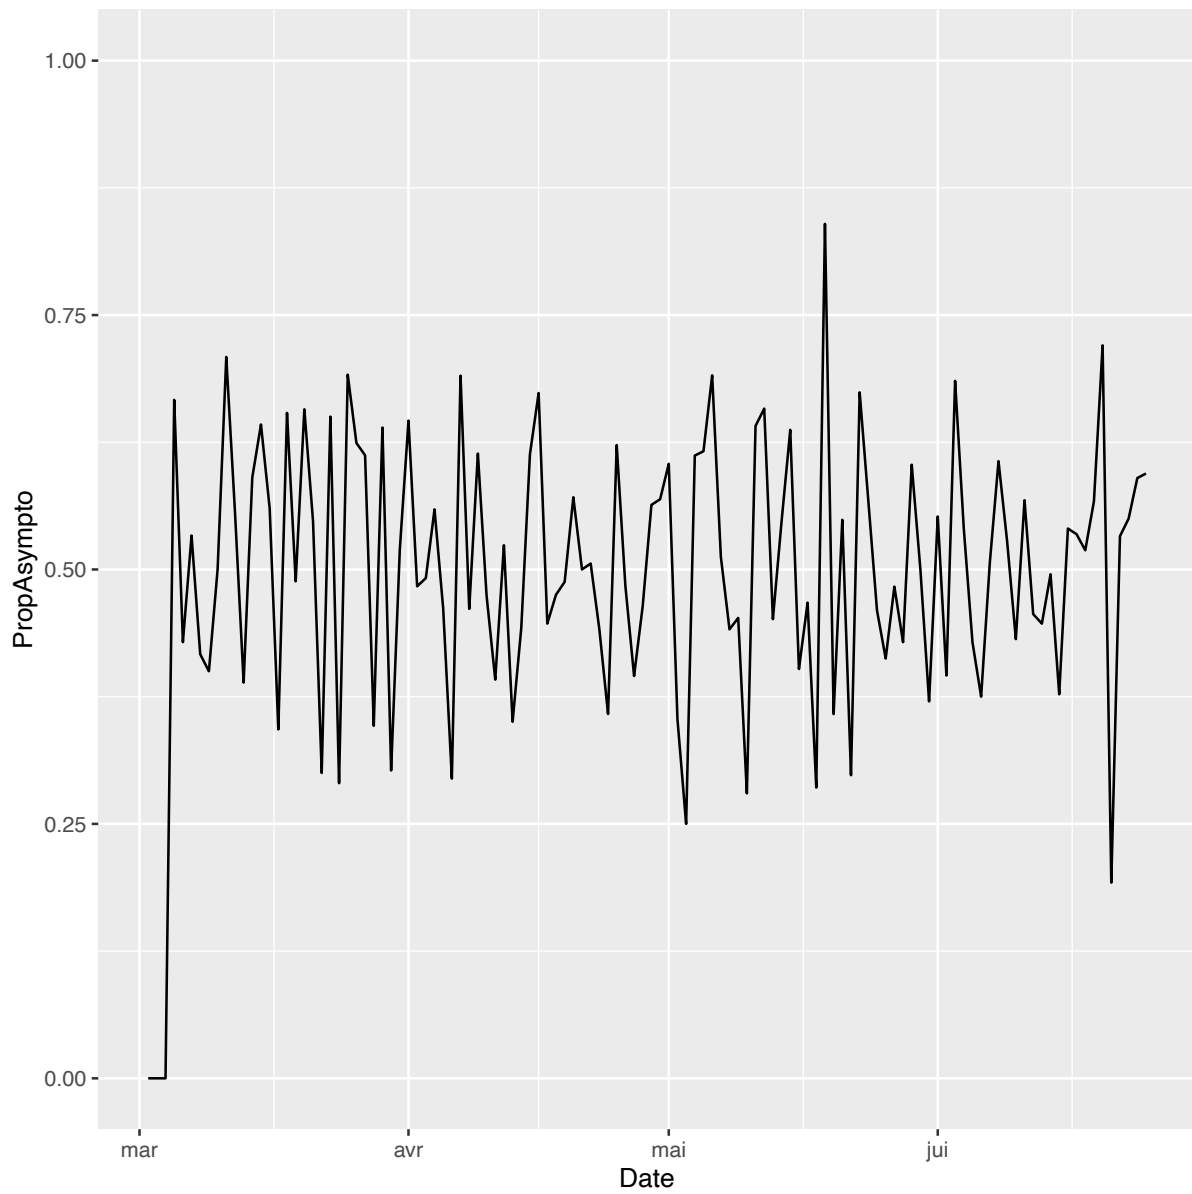

|                                                                                                                 | X2.5.       | X97.5.    | start | end |
|-----------------------------------------------------------------------------------------------------------------|-------------|-----------|-------|-----|
| <b>ClosDaycare ClosPrim ClosSec ClosHigh MassGather50 MassGatherAll ClosPubAny</b>                              | 0.009327097 | 0.2458519 | 12    | 17  |
| <b>StayHomeOrder ClosDaycare ClosPrim ClosSec ClosHigh MassGather50 MassGatherAll ClosPubAny MasksMandatory</b> | 0.8131597   | 0.8390755 | 17    | 55  |
| <b>ClosDaycare ClosPrim ClosSec ClosHigh MassGather50 MassGatherAll ClosPubAny MasksMandatory</b>               | 0.8636813   | 0.9116906 | 55    | 72  |
| <b>ClosPrim ClosSec ClosHighPartial MasksMandatoryPartial</b>                                                   | 0.7956068   | 0.8351636 | 72    | 99  |
| <b>ClosPrimPartial ClosSecPartial ClosHighPartial MasksMandatoryPartial</b>                                     | 0.6996113   | 0.7733447 | 99    | 116 |

Denmark:

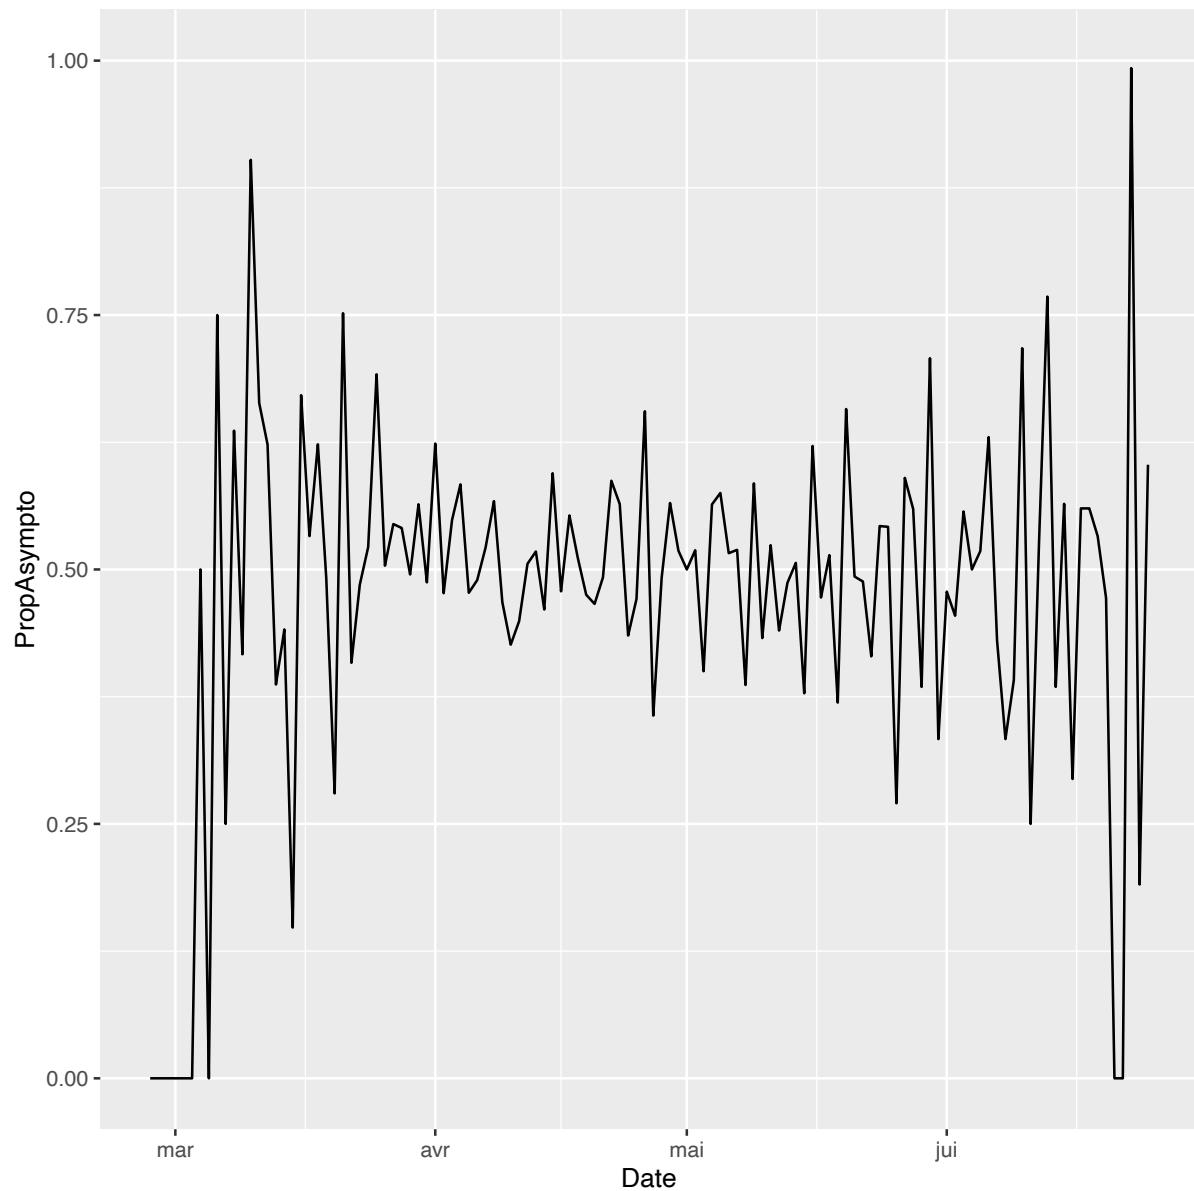

|                                                                                                                  | X2.5.     | X97.5.    | start | end |
|------------------------------------------------------------------------------------------------------------------|-----------|-----------|-------|-----|
| StayHomeRiskG ClosDaycare ClosPrim ClosSec ClosHigh MassGather50<br>MassGatherAll ClosPubAny TeleworkingClosures | 0.6406767 | 0.7459364 | 19    | 50  |
| StayHomeRiskG ClosSec ClosHigh MassGather50 MassGatherAll<br>ClosPubAny TeleworkingClosures                      | 0.6549227 | 0.9387096 | 50    | 55  |
| StayHomeRiskG ClosSec ClosHigh MassGather50 MassGatherAll<br>TeleworkingClosures ClosPubAnyPartial               | 0.7838244 | 0.8487509 | 55    | 75  |
| StayHomeRiskG ClosSec ClosHigh MassGather50 MassGatherAll<br>ClosPubAnyPartial                                   | 0.7285929 | 0.8587607 | 75    | 83  |
| StayHomeRiskG ClosHigh MassGather50 MassGatherAll<br>ClosPubAnyPartial                                           | 0.8000965 | 0.8563565 | 83    | 110 |
| StayHomeRiskG ClosHigh MassGather50 MassGatherAllPartial<br>ClosPubAnyPartial                                    | 0.5662119 | 0.7091267 | 110   | 120 |

Estonia:

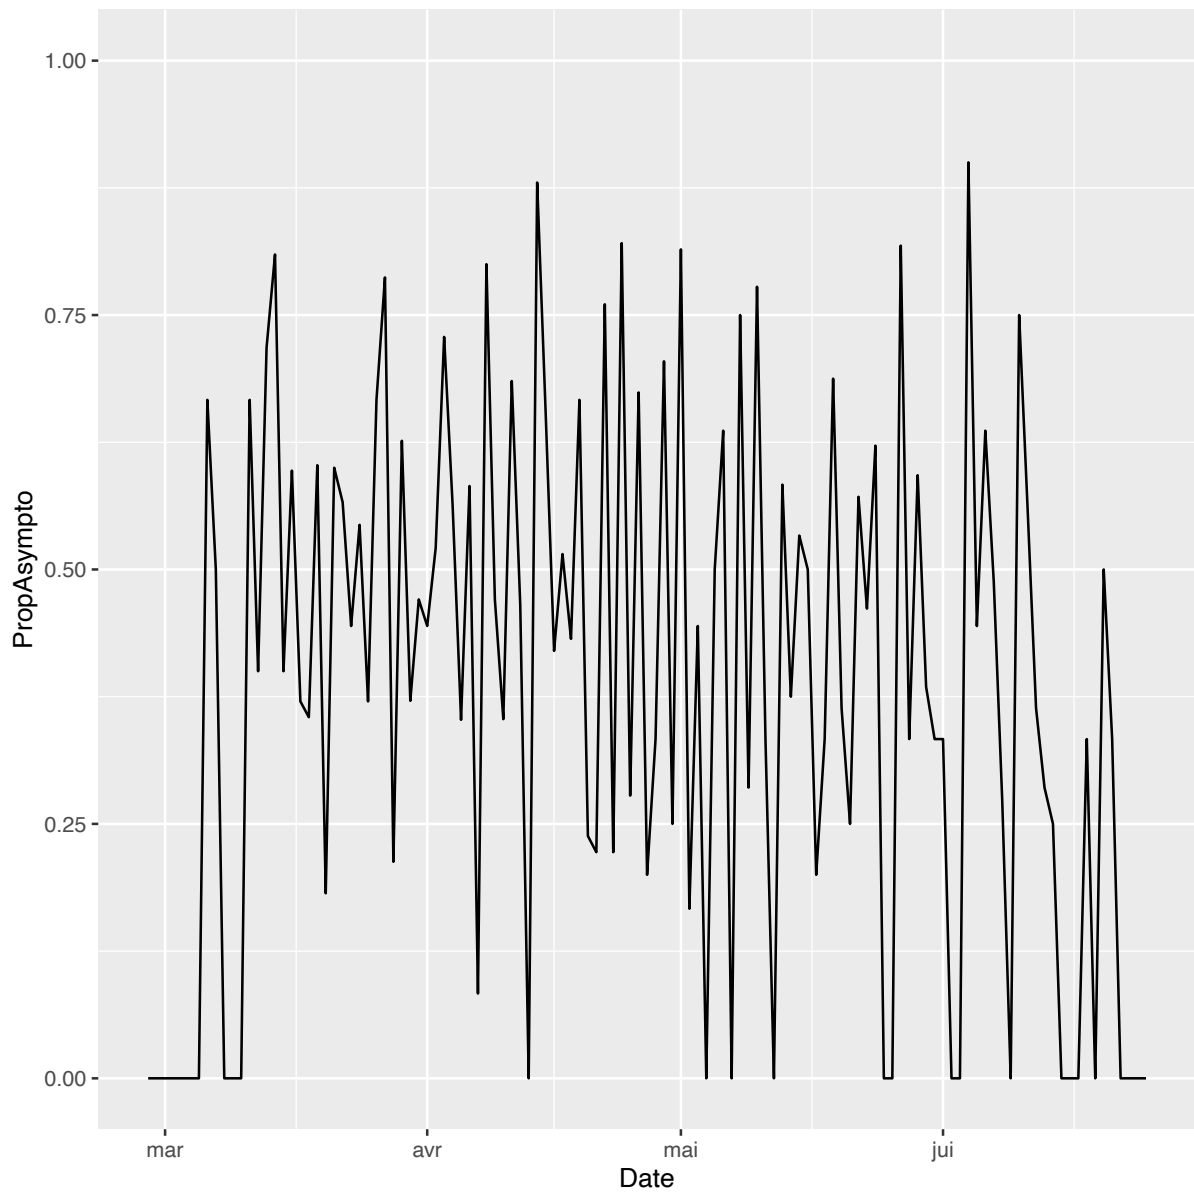

|                                                                                                                   | X2.5.     | X97.5.    | start | end |
|-------------------------------------------------------------------------------------------------------------------|-----------|-----------|-------|-----|
| StayHomeGen ClosPrim ClosSec ClosHigh MassGather50 MassGatherAll<br>ClosPubAny MasksVoluntary TeleworkingClosures | 0.7460167 | 0.7612066 | 17    | 81  |
| MassGather50 MassGatherAll TeleworkingClosures ClosPubAnyPartial<br>MasksVoluntaryPartial                         | 0.8239704 | 0.8914999 | 81    | 95  |
| MassGatherAll TeleworkingClosures ClosPubAnyPartial<br>MasksVoluntaryPartial                                      | 0.7048766 | 0.8196269 | 95    | 119 |

Finland:

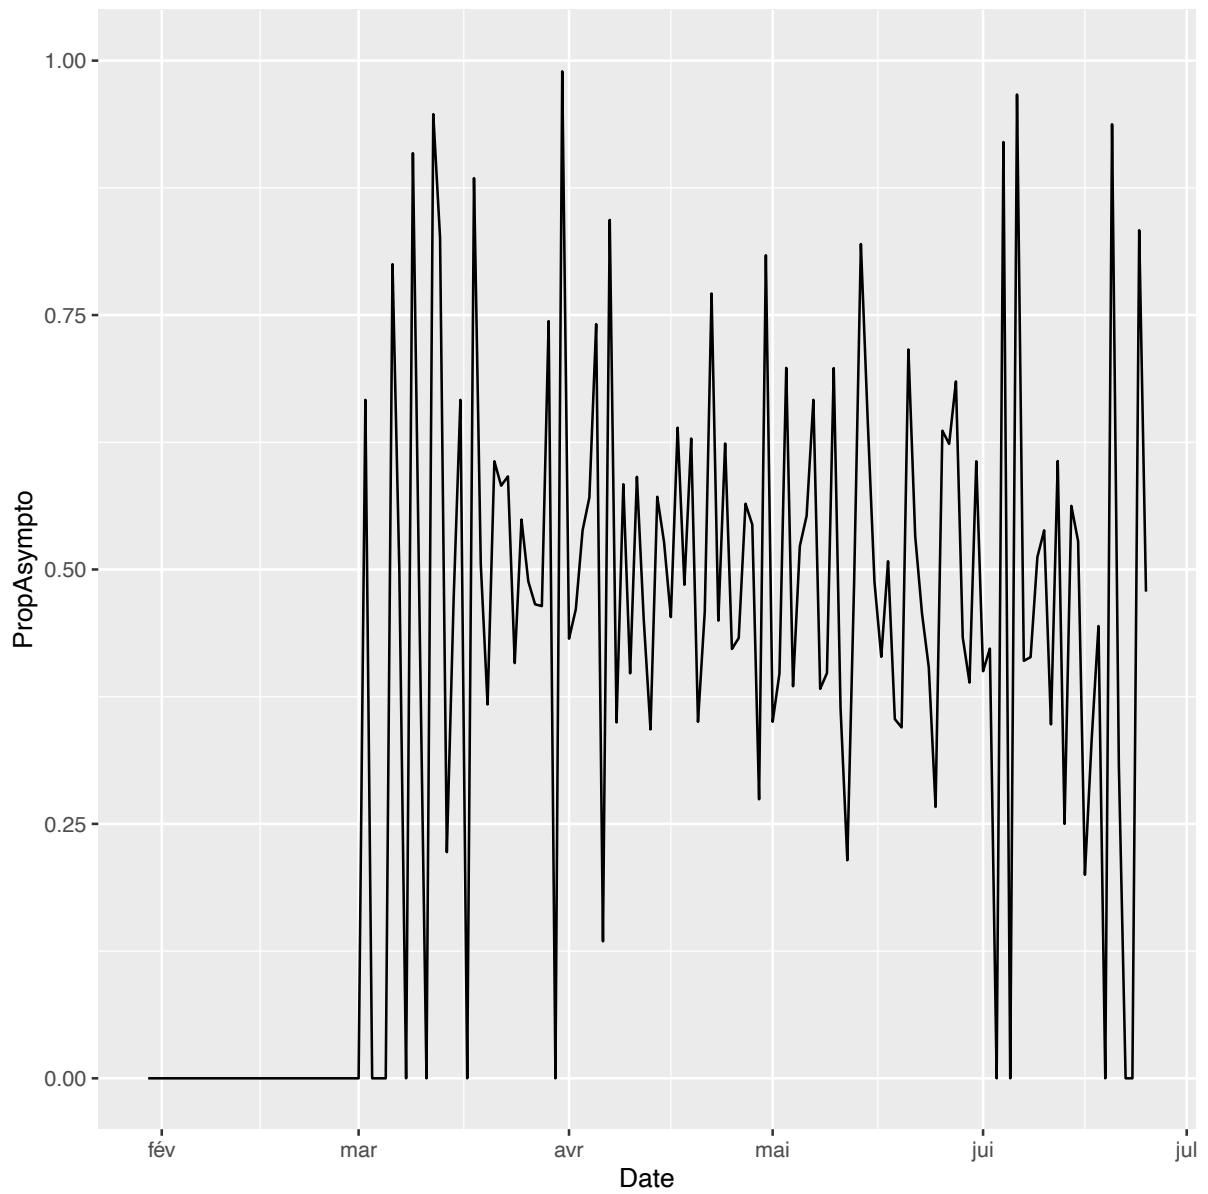

|                                                                                                      | X2.5.     | X97.5.    | start | end |
|------------------------------------------------------------------------------------------------------|-----------|-----------|-------|-----|
| StayHomeRiskG ClosPrim ClosSec ClosHigh MassGather50<br>MassGatherAll ClosPubAny TeleworkingClosures | 0.2601543 | 0.4417907 | 47    | 107 |
| StayHomeRiskG ClosSec ClosHigh MassGather50 MassGatherAll<br>ClosPubAny TeleworkingClosures          | 0.6166629 | 0.7949916 | 107   | 124 |
| StayHomeRiskG ClosSec ClosHigh MassGather50 MassGatherAll<br>TeleworkingClosures ClosPubAnyPartial   | 0.6557051 | 0.78403   | 124   | 148 |



France

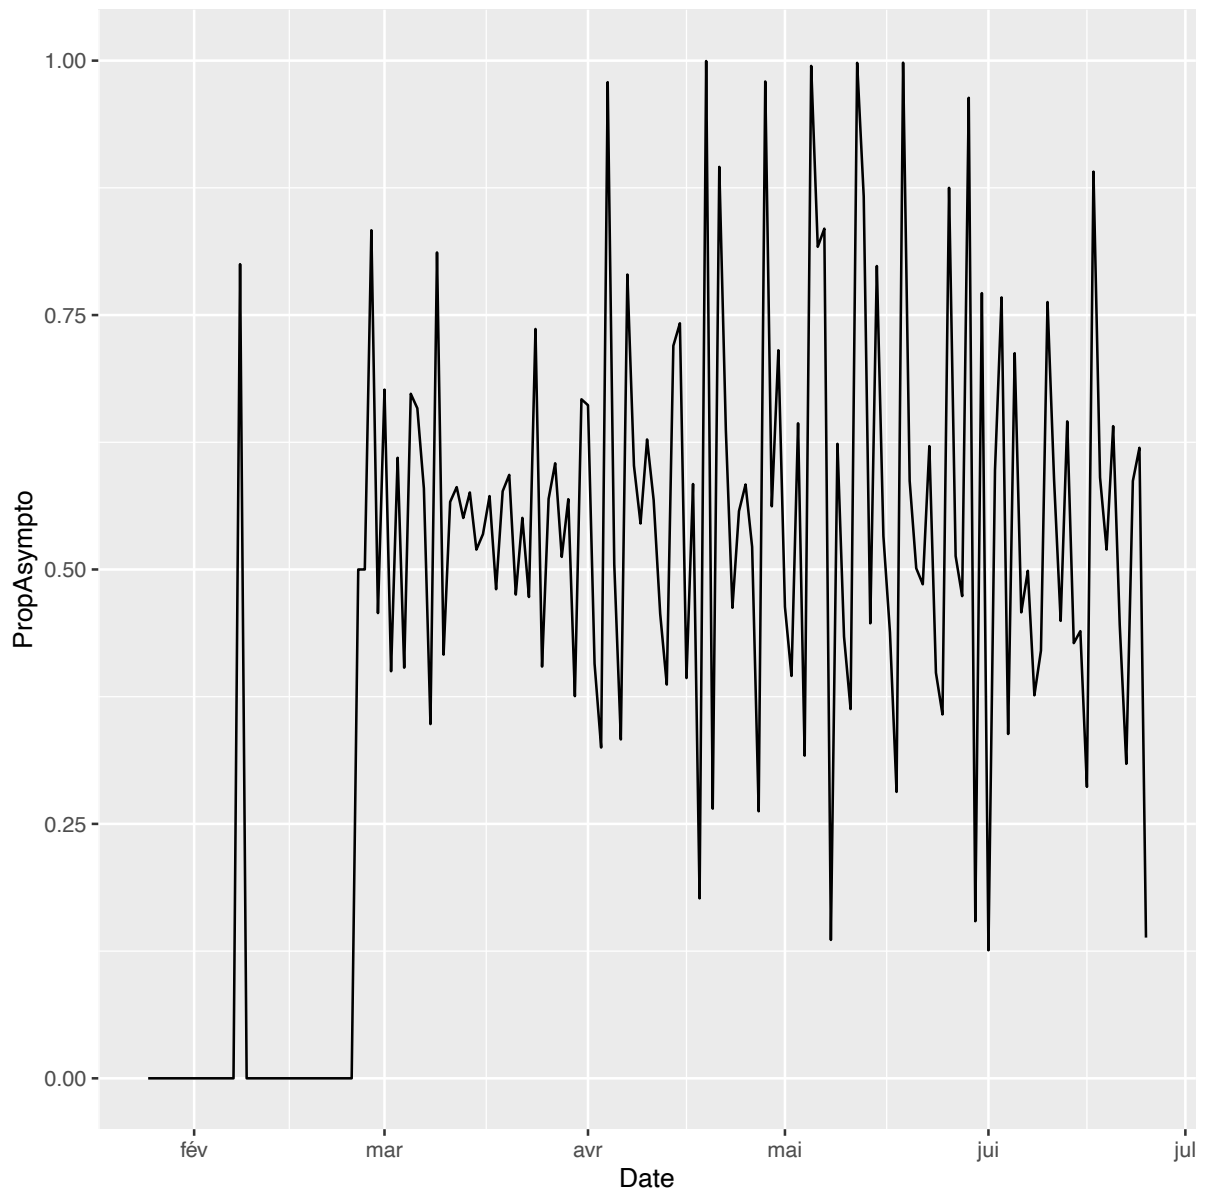

|                                                                                                                                                                 | X2.5.     | X97.5.    | start | end |
|-----------------------------------------------------------------------------------------------------------------------------------------------------------------|-----------|-----------|-------|-----|
| <b>MassGatherAll</b>                                                                                                                                            | 0.3671854 | 0.4935812 | 36    | 53  |
| <b>StayHomeOrder ClosDaycare ClosPrim ClosSec ClosHigh MassGather50 MassGatherAll ClosPubAny TeleworkingClosures</b>                                            | 0.6830383 | 0.7442673 | 53    | 109 |
| <b>ClosDaycare MassGather50 MassGatherAll MasksVoluntary ClosPrimPartial ClosSecPartial ClosHighPartial ClosPubAnyPartial TeleworkingClosuresPartial</b>        | 0.4363916 | 0.8856388 | 109   | 130 |
| <b>MassGather50 MassGatherAll MasksVoluntary ClosDaycarePartial ClosPrimPartial ClosSecPartial ClosHighPartial ClosPubAnyPartial TeleworkingClosuresPartial</b> | 0.7152738 | 0.8280731 | 130   | 144 |
| <b>MasksVoluntary ClosDaycarePartial ClosPrimPartial ClosSecPartial ClosHighPartial ClosPubAnyPartial TeleworkingClosuresPartial</b>                            | 0.8878001 | 0.9096427 | 144   | 153 |
| <b>MasksVoluntary ClosHighPartial ClosPubAnyPartial TeleworkingClosuresPartial</b>                                                                              | 0.5832764 | 0.7017442 | 153   | 153 |

Germany:

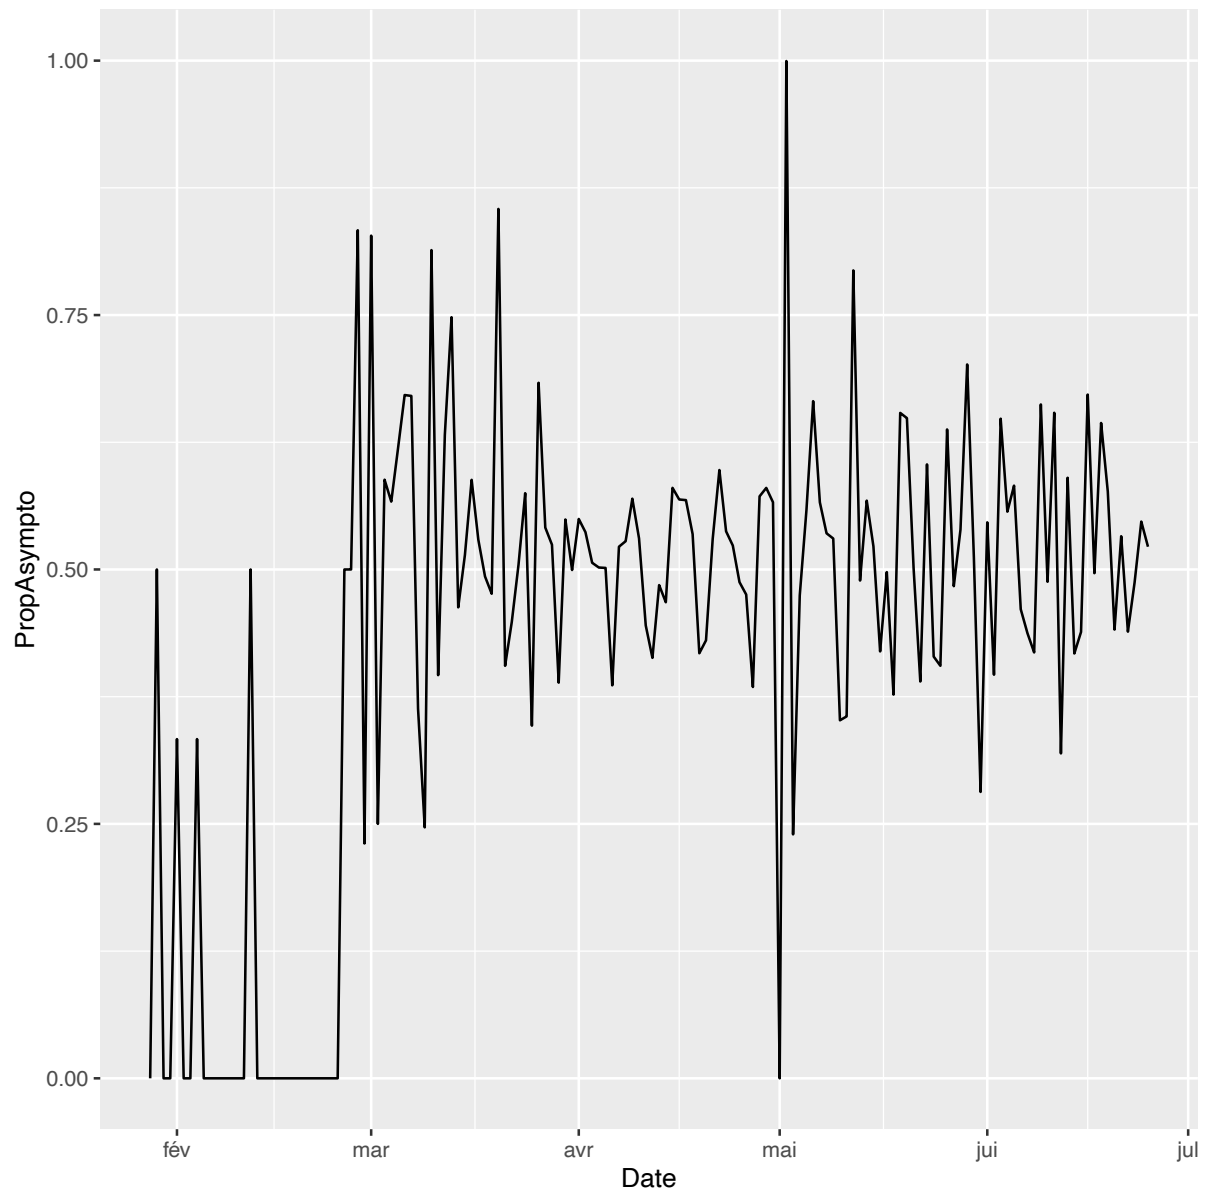

|                                                                                                      | X2.5.      | X97.5.    | start | end |
|------------------------------------------------------------------------------------------------------|------------|-----------|-------|-----|
| <b>MassGatherAll</b>                                                                                 | 0.6131679  | 0.7571718 | 41    | 49  |
| <b>StayHomeGen ClosDaycare ClosPrim ClosSec MassGatherAll ClosPubAny</b>                             | 0.1615996  | 0.2751509 | 49    | 56  |
| <b>StayHomeGen ClosDaycare ClosPrim ClosSec MassGather50 MassGatherAll ClosPubAny</b>                | 0.1427254  | 0.5019229 | 56    | 66  |
| <b>StayHomeGen ClosDaycare ClosPrim ClosSec MassGather50 MassGatherAll ClosPubAny MasksVoluntary</b> | 0.7911039  | 0.8891682 | 66    | 91  |
| <b>StayHomeGen ClosDaycare ClosPrim ClosSec MassGather50 MassGatherAll ClosPubAny MasksMandatory</b> | 0.06492133 | 0.4200395 | 91    | 100 |
| <b>ClosDaycare MassGather50 MassGatherAll MasksMandatory StayHomeGenPartial ClosPubAnyPartial</b>    | 0.8656521  | 0.9715488 | 100   | 108 |
| <b>MassGather50 MasksMandatory StayHomeGenPartial MassGatherAllPartial ClosPubAnyPartial</b>         | 0.7095472  | 0.8329314 | 108   | 133 |

|                                                                                      |           |           |     |     |
|--------------------------------------------------------------------------------------|-----------|-----------|-----|-----|
| <b>MassGather50 MasksVoluntary StayHomeGenPartial</b><br><b>MassGatherAllPartial</b> | 0.5525079 | 0.7116949 | 133 | 150 |
|--------------------------------------------------------------------------------------|-----------|-----------|-----|-----|

Greece

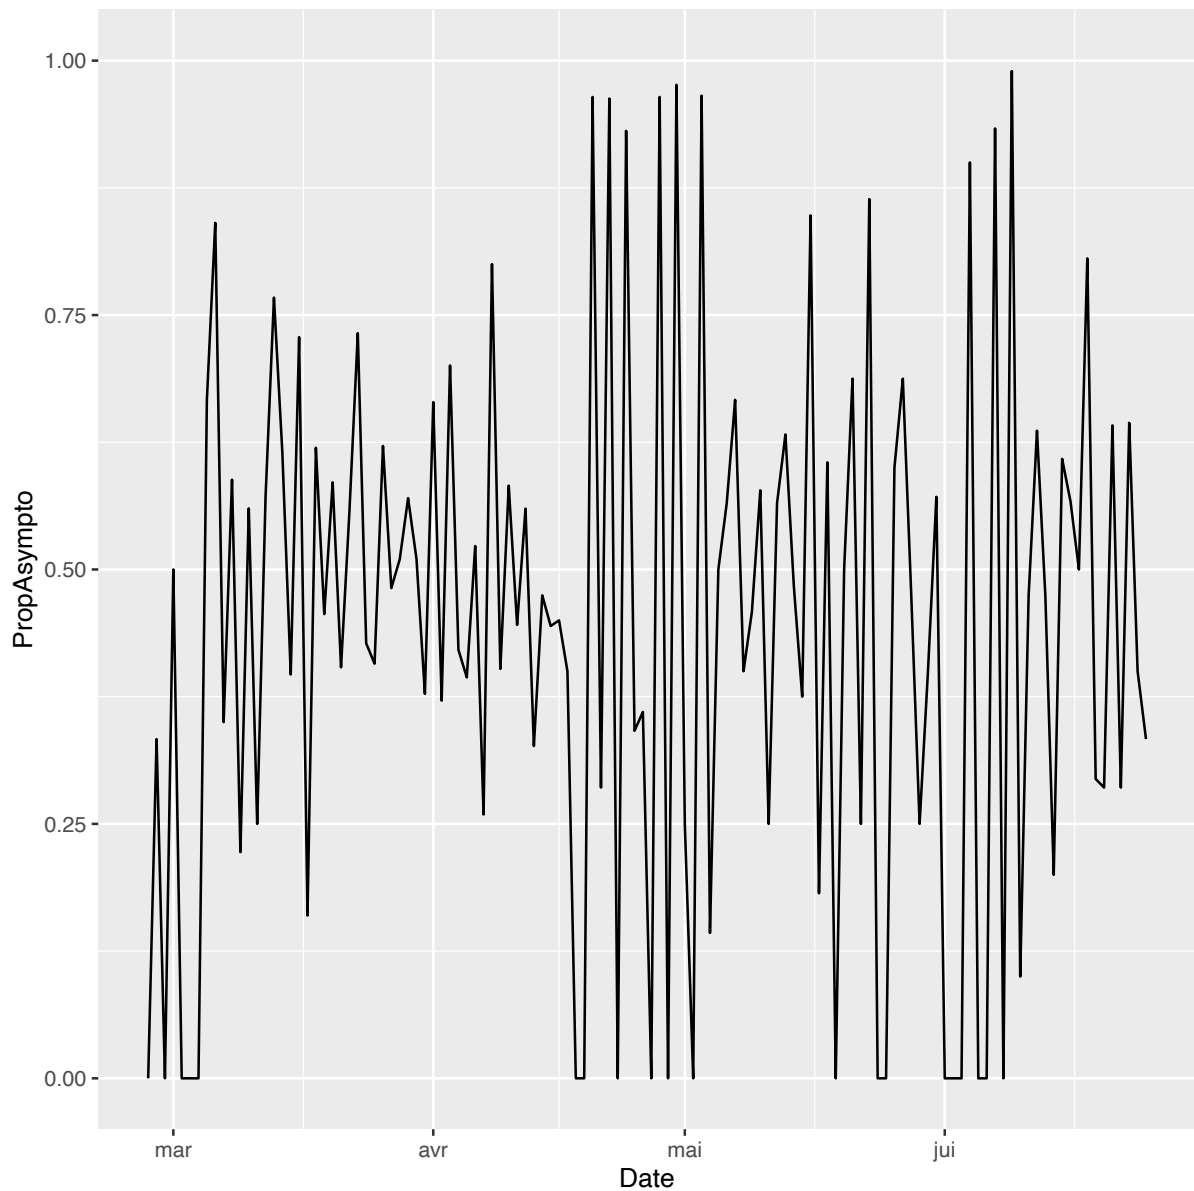

|                                                                                                                                     | X2.5.     | X97.5.    | start | end |
|-------------------------------------------------------------------------------------------------------------------------------------|-----------|-----------|-------|-----|
| <b>StayHomeGen ClosDaycare ClosPrim ClosSec ClosHigh ClosPubAny</b>                                                                 | 0.3389382 | 0.3389382 | 16    | 25  |
| <b>StayHomeOrder ClosDaycare ClosPrim ClosSec ClosHigh MassGather50 MassGatherAll ClosPubAny TeleworkingClosures</b>                | 0.7616343 | 0.7616343 | 25    | 62  |
| <b>StayHomeOrder ClosDaycare ClosPrim ClosSec ClosHigh MassGather50 MassGatherAll ClosPubAny MasksMandatory TeleworkingClosures</b> | 0.824038  | 0.824038  | 62    | 69  |
| <b>ClosDaycare ClosPrim ClosSec ClosHigh MassGather50 MassGatherAll MasksMandatory TeleworkingClosures ClosPubAnyPartial</b>        | 0.7272    | 0.7272    | 69    | 75  |
| <b>ClosDaycare ClosPrim ClosHigh MassGather50 MassGatherAll MasksMandatory TeleworkingClosures ClosSecPartial ClosPubAnyPartial</b> | 0.8518032 | 0.8518032 | 75    | 83  |
| <b>ClosDaycare ClosPrim ClosHigh MassGather50 MassGatherAll MasksMandatory TeleworkingClosures ClosPubAnyPartial</b>                | 0.8637879 | 0.8637879 | 83    | 89  |
| <b>ClosDaycare ClosPrim MassGather50 MassGatherAll MasksMandatory TeleworkingClosures ClosHighPartial ClosPubAnyPartial</b>         | 0.691929  | 0.691929  | 89    | 97  |

|                                                                                                            |           |           |    |     |
|------------------------------------------------------------------------------------------------------------|-----------|-----------|----|-----|
| <b>MassGather50 MassGatherAll MasksMandatory TeleworkingClosures<br/>ClosHighPartial ClosPubAnyPartial</b> | 0.5179881 | 0.5179881 | 97 | 120 |
|------------------------------------------------------------------------------------------------------------|-----------|-----------|----|-----|

Hungary

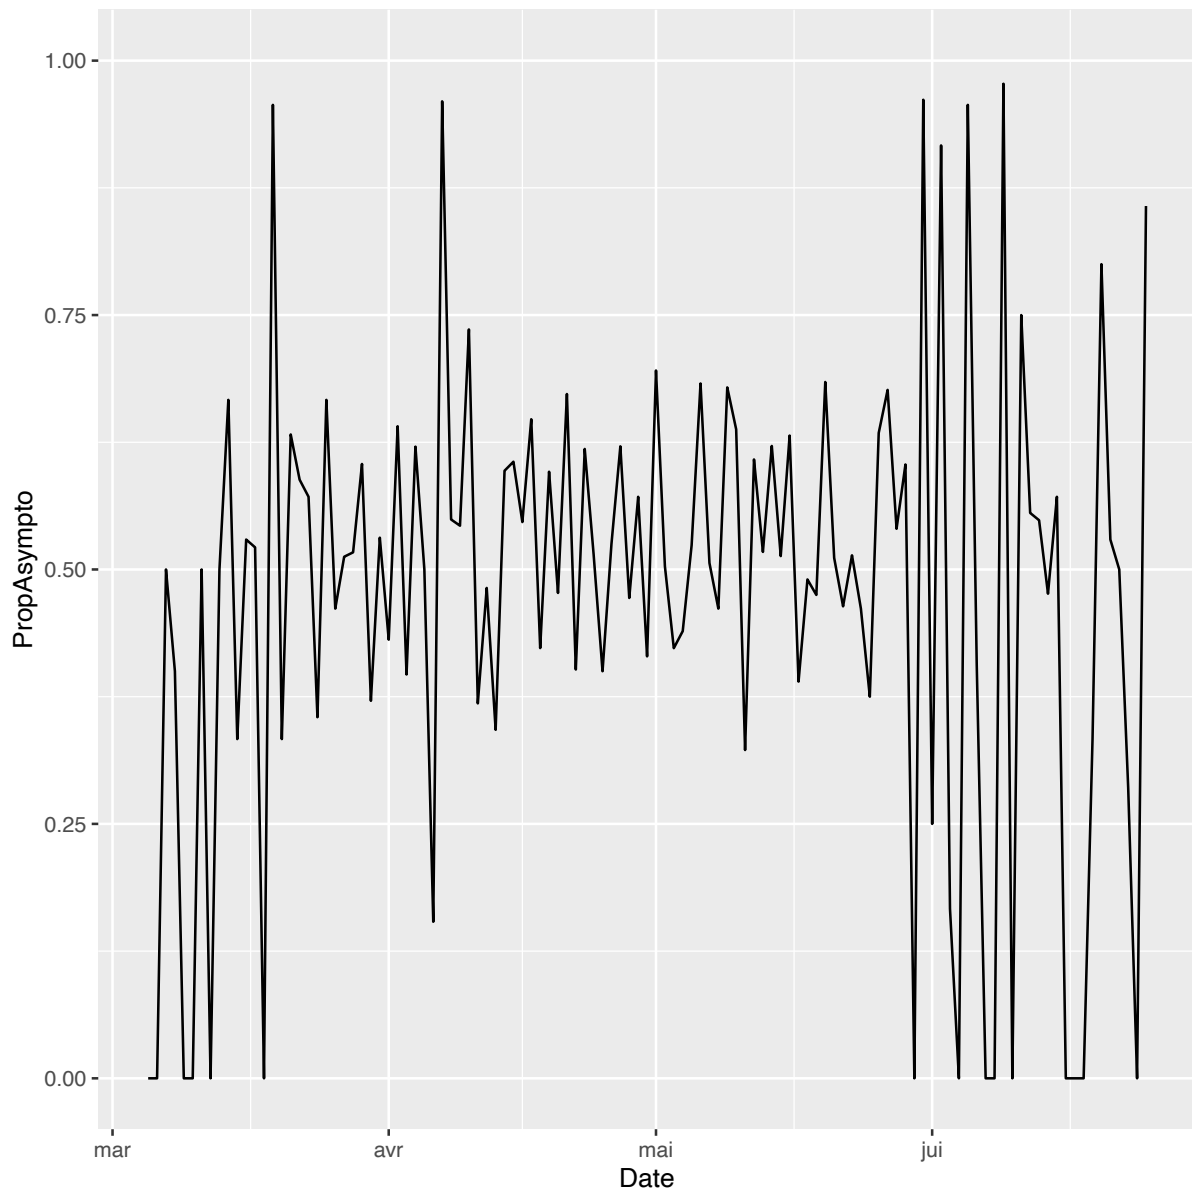

|                                                                                                                 | X2.5.      | X97.5.    | start | end |
|-----------------------------------------------------------------------------------------------------------------|------------|-----------|-------|-----|
| <b>ClosDaycare ClosPrim ClosSec ClosHigh MassGather50 MassGatherAll ClosPubAny</b>                              | 0.1512335  | 0.3238135 | 10    | 17  |
| <b>StayHomeGen ClosDaycare ClosPrim ClosSec ClosHigh MassGather50 MassGatherAll ClosPubAny</b>                  | 0.03073178 | 0.2554018 | 17    | 23  |
| <b>StayHomeOrder ClosDaycare ClosPrim ClosSec ClosHigh MassGather50 MassGatherAll ClosPubAny</b>                | 0.5399449  | 0.6195966 | 23    | 54  |
| <b>StayHomeOrder ClosDaycare ClosPrim ClosSec ClosHigh MassGather50 MassGatherAll ClosPubAny MasksMandatory</b> | 0.7774677  | 0.8246937 | 54    | 76  |
| <b>ClosDaycare ClosPrim ClosSec MassGather50 MassGatherAll MasksMandatory</b>                                   | 0.7527038  | 0.814701  | 76    | 100 |
| <b>ClosDaycare ClosPrim ClosSec MasksMandatory</b>                                                              | 0.7680321  | 0.9083588 | 100   | 113 |

Iceland

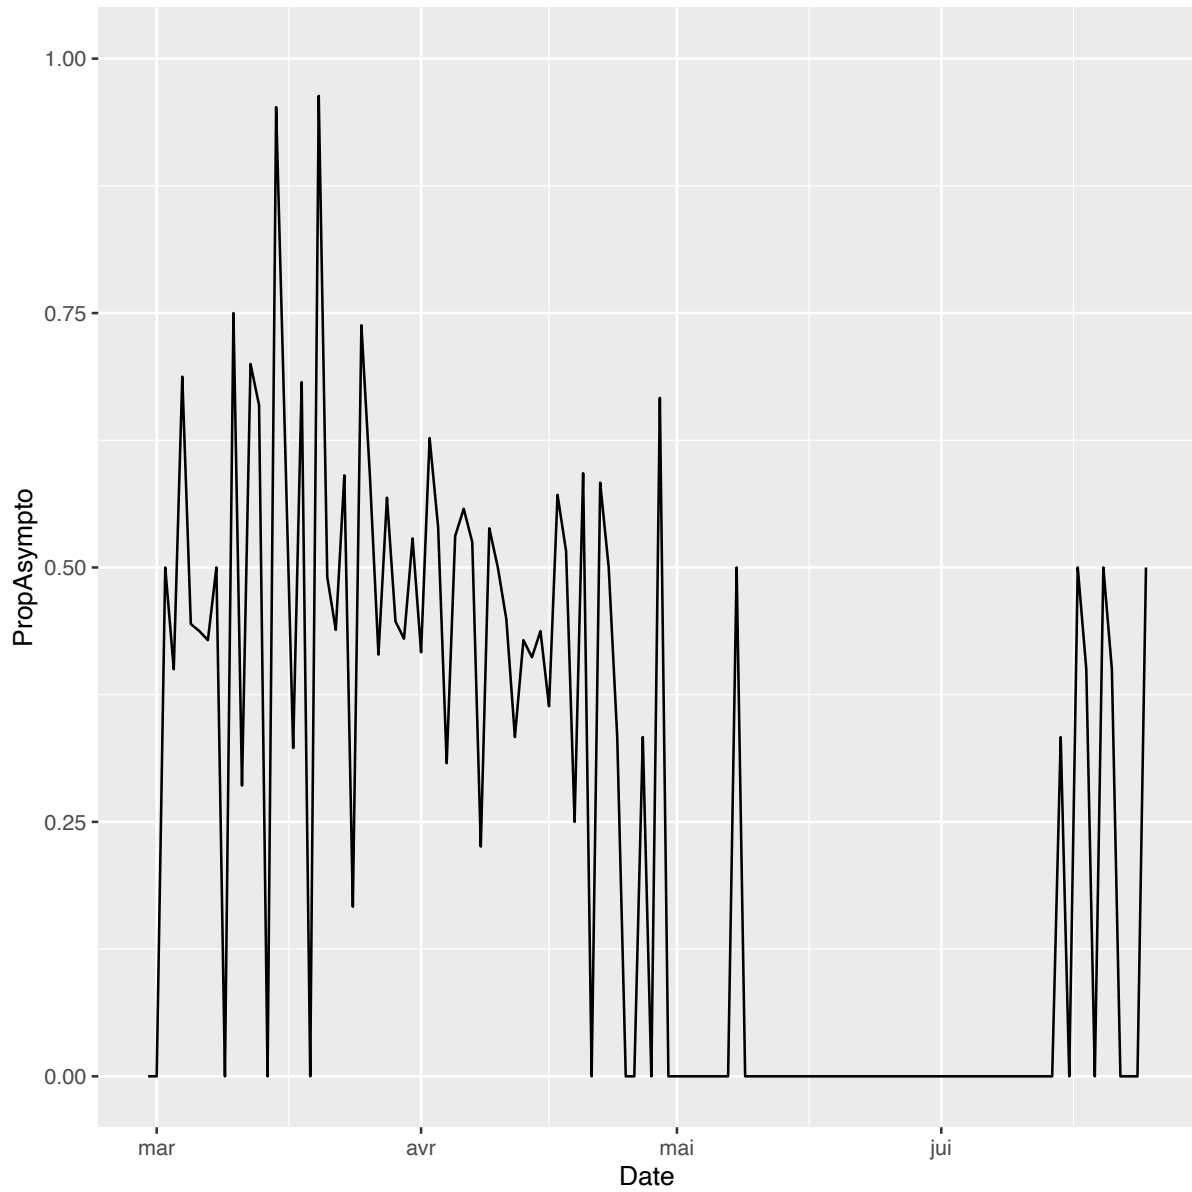

|                                                                      | X2.5.       | X97.5.     | start | end |
|----------------------------------------------------------------------|-------------|------------|-------|-----|
| StayHomeRiskG ClosSec ClosHigh MassGatherAll ClosPubAny              | 0.004509761 | 0.09601767 | 17    | 25  |
| StayHomeRiskG ClosSec ClosHigh MassGather50 MassGatherAll ClosPubAny | 0.8620133   | 0.8746733  | 25    | 67  |
| StayHomeRiskG MassGather50 MassGatherAll ClosPubAnyPartial           | 0.8884882   | 0.9666913  | 67    | 88  |
| StayHomeRiskG MassGatherAll ClosPubAnyPartial                        | 0.458724    | 0.5026657  | 88    | 109 |
| StayHomeRiskG MassGatherAllPartial                                   | 0.5922207   | 0.7829101  | 109   | 118 |

*Ireland*

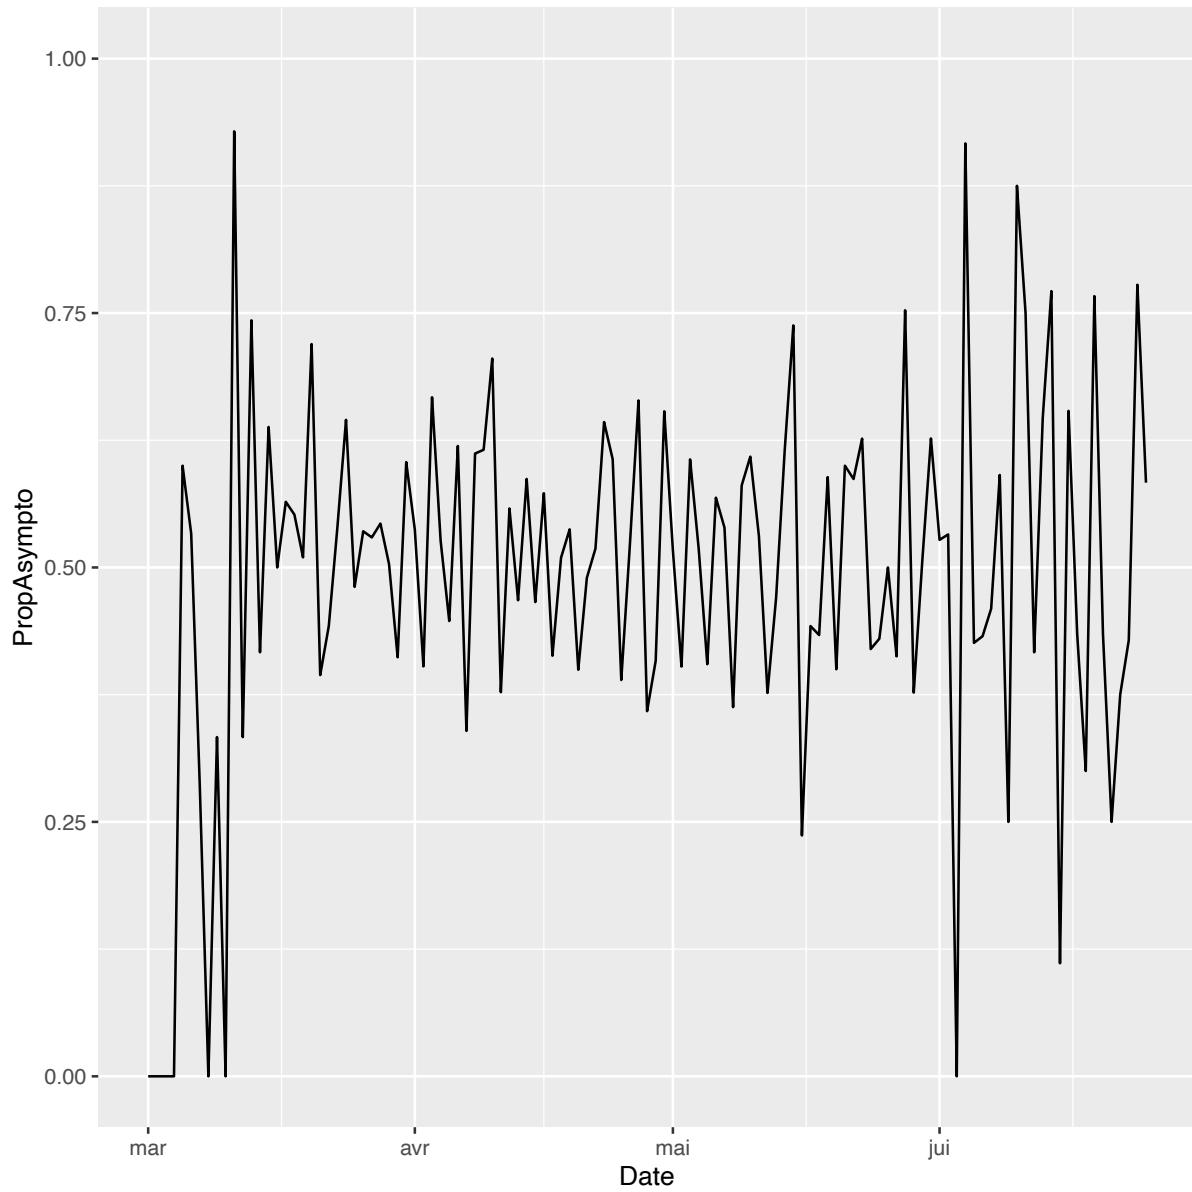

|                                                                                                                                                                | X2.5.     | X97.5.    | start | end |
|----------------------------------------------------------------------------------------------------------------------------------------------------------------|-----------|-----------|-------|-----|
| StayHomeGen StayHomeRiskG ClosDaycare ClosPrim ClosSec ClosHigh<br>MassGatherAll ClosPubAny TeleworkingClosures                                                | 0.1098712 | 0.1981057 | 12    | 26  |
| StayHomeOrder StayHomeRiskG ClosDaycare ClosPrim ClosSec<br>ClosHigh MassGather50 MassGatherAll ClosPubAny<br>TeleworkingClosures                              | 0.7804695 | 0.8198462 | 26    | 79  |
| StayHomeRiskG ClosDaycare ClosPrim ClosSec ClosHigh MassGather50<br>MassGatherAll ClosPubAny MasksVoluntary TeleworkingClosures<br>StayHomeOrderPartial        | 0.902223  | 0.9635073 | 79    | 100 |
| StayHomeRiskG ClosDaycare ClosPrim ClosSec ClosHigh MassGather50<br>MassGatherAll ClosPubAny MasksVoluntary StayHomeOrderPartial<br>TeleworkingClosuresPartial | 0.8005851 | 0.933943  | 100   | 117 |



Italy

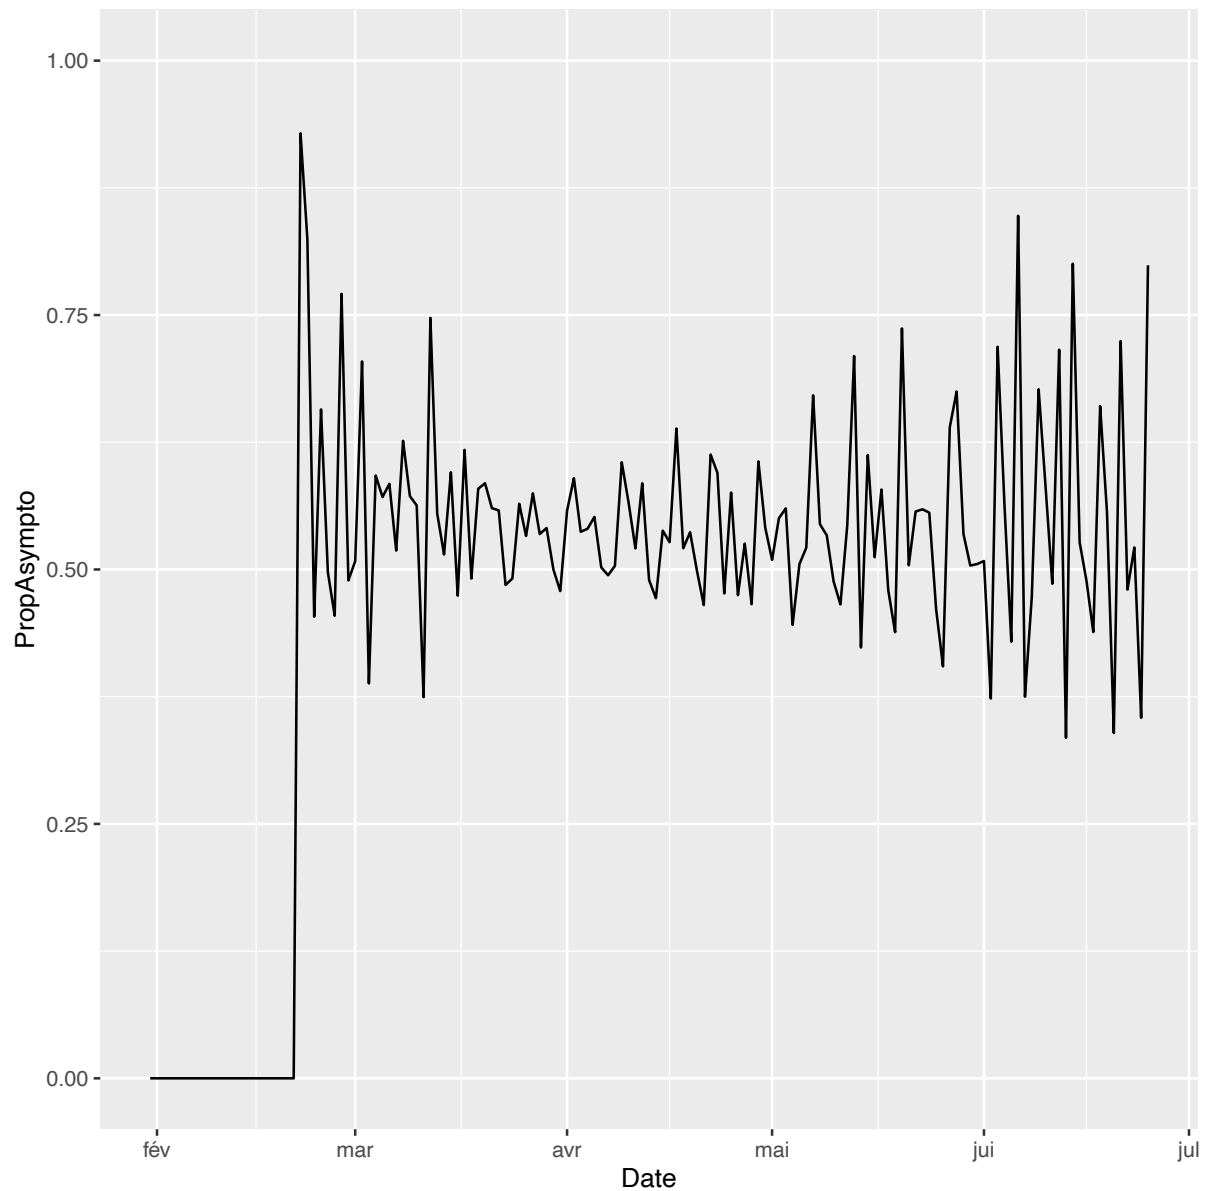

|                                                                                                                                                   | X2.5.     | X97.5.    | start | end |
|---------------------------------------------------------------------------------------------------------------------------------------------------|-----------|-----------|-------|-----|
| StayHomeRiskG ClosDaycare ClosPrim ClosSec ClosHigh                                                                                               | 0.2448394 | 0.3531937 | 34    | 41  |
| StayHomeOrder StayHomeRiskG ClosDaycare ClosPrim ClosSec ClosHigh MassGather50 MassGatherAll ClosPubAny TeleworkingClosures                       | 0.580979  | 0.7134022 | 41    | 75  |
| StayHomeOrder StayHomeRiskG ClosDaycare ClosPrim ClosSec ClosHigh MassGather50 MassGatherAll ClosPubAny MasksMandatory TeleworkingClosures        | 0.7649104 | 0.9450575 | 75    | 81  |
| StayHomeOrder StayHomeRiskG ClosDaycare ClosPrim ClosSec ClosHigh MassGather50 MassGatherAll MasksMandatory TeleworkingClosures ClosPubAnyPartial | 0.7741918 | 0.8760376 | 81    | 96  |
| StayHomeRiskG ClosDaycare ClosPrim ClosSec ClosHigh MassGather50 MassGatherAll MasksMandatory TeleworkingClosures ClosPubAnyPartial               | 0.7349938 | 0.8507959 | 96    | 138 |
| StayHomeRiskG ClosDaycare ClosPrim ClosHigh MassGatherAll MasksMandatory TeleworkingClosures ClosSecPartial                                       | 0.586409  | 0.7802264 | 138   | 147 |

Latvia

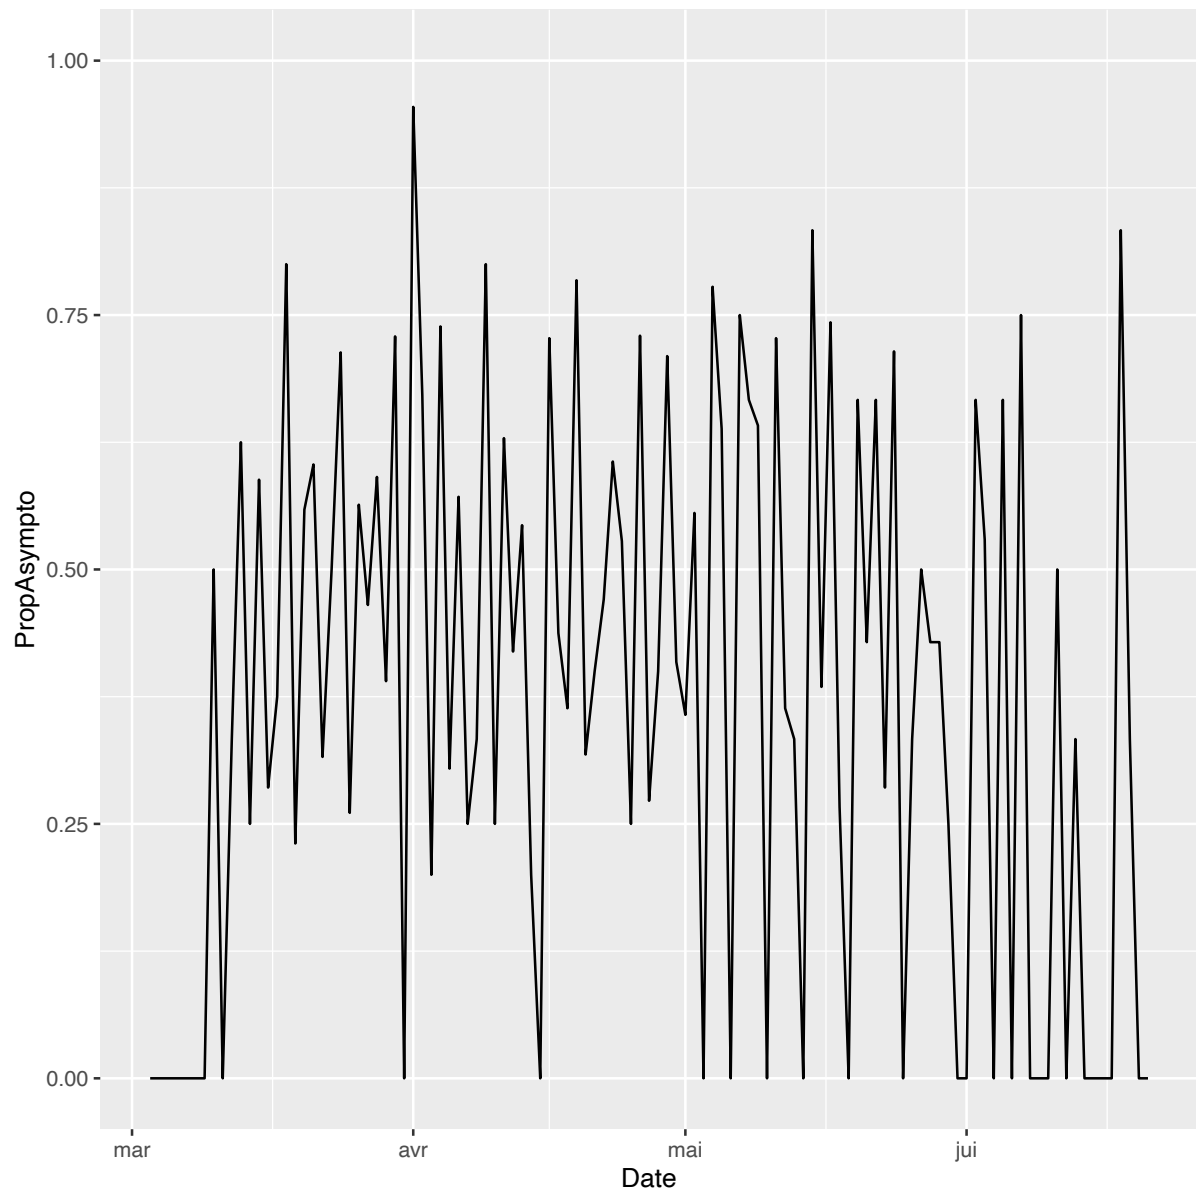

|                                                                                                                                     | X2.5.     | X97.5.    | start | end |
|-------------------------------------------------------------------------------------------------------------------------------------|-----------|-----------|-------|-----|
| StayHomeGen ClosPrim ClosSec ClosHigh MassGather50 MassGatherAll ClosPubAny TeleworkingClosures                                     | 0.5405679 | 0.5946914 | 15    | 49  |
| StayHomeGen ClosPrim ClosSec ClosHigh MassGather50 MassGatherAll ClosPubAny MasksVoluntary TeleworkingClosures                      | 0.7331865 | 0.8333141 | 49    | 66  |
| StayHomeGen ClosPrim ClosSec ClosHigh MassGather50 ClosPubAny MasksVoluntary TeleworkingClosures MassGatherAllPartial               | 0.2109815 | 0.5736334 | 66    | 71  |
| ClosPrim ClosSec ClosHigh MassGather50 MasksVoluntary TeleworkingClosures StayHomeGenPartial MassGatherAllPartial ClosPubAnyPartial | 0.7304378 | 0.8062734 | 71    | 101 |
| TeleworkingClosures                                                                                                                 | 0.4789654 | 0.8583957 | 101   | 111 |

Liechtenstein

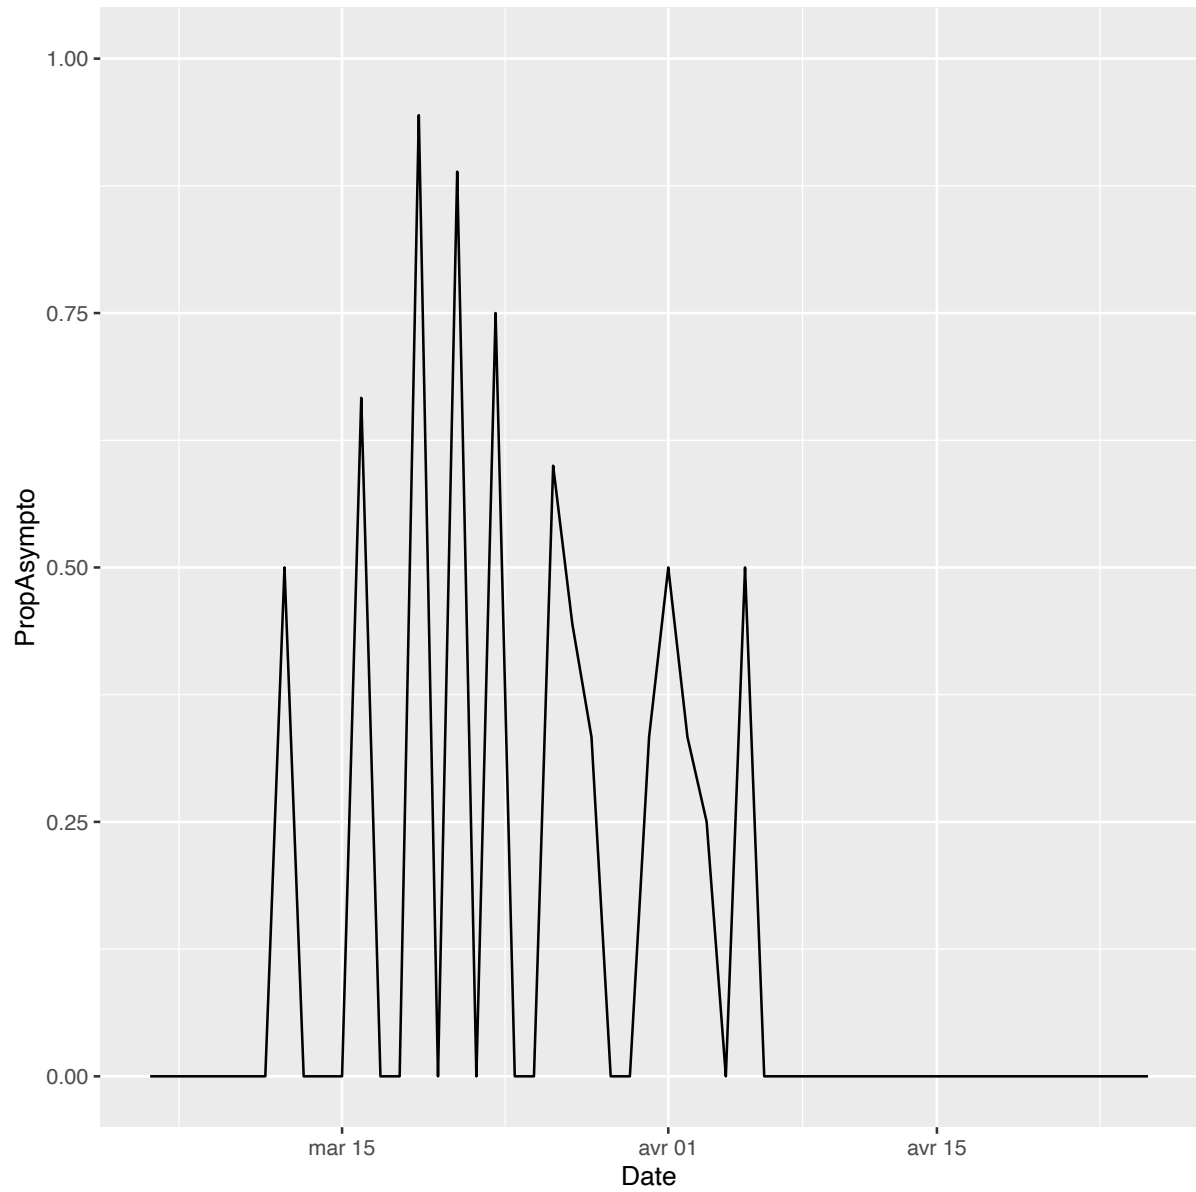

|                                                                                                                 | X2.5.          | X97.5.       | start | End |
|-----------------------------------------------------------------------------------------------------------------|----------------|--------------|-------|-----|
| StayHomeRiskG ClosDaycare ClosPrim ClosSec ClosHigh MassGather50<br>MassGatherAll ClosPubAnyPartial             | 0.006783554925 | 0.4148611775 | 11    | 17  |
| StayHomeGen StayHomeRiskG ClosDaycare ClosPrim ClosSec ClosHigh<br>MassGather50 MassGatherAll ClosPubAnyPartial | 0.456675205    | 0.797298345  | 17    | 53  |

Lithuania

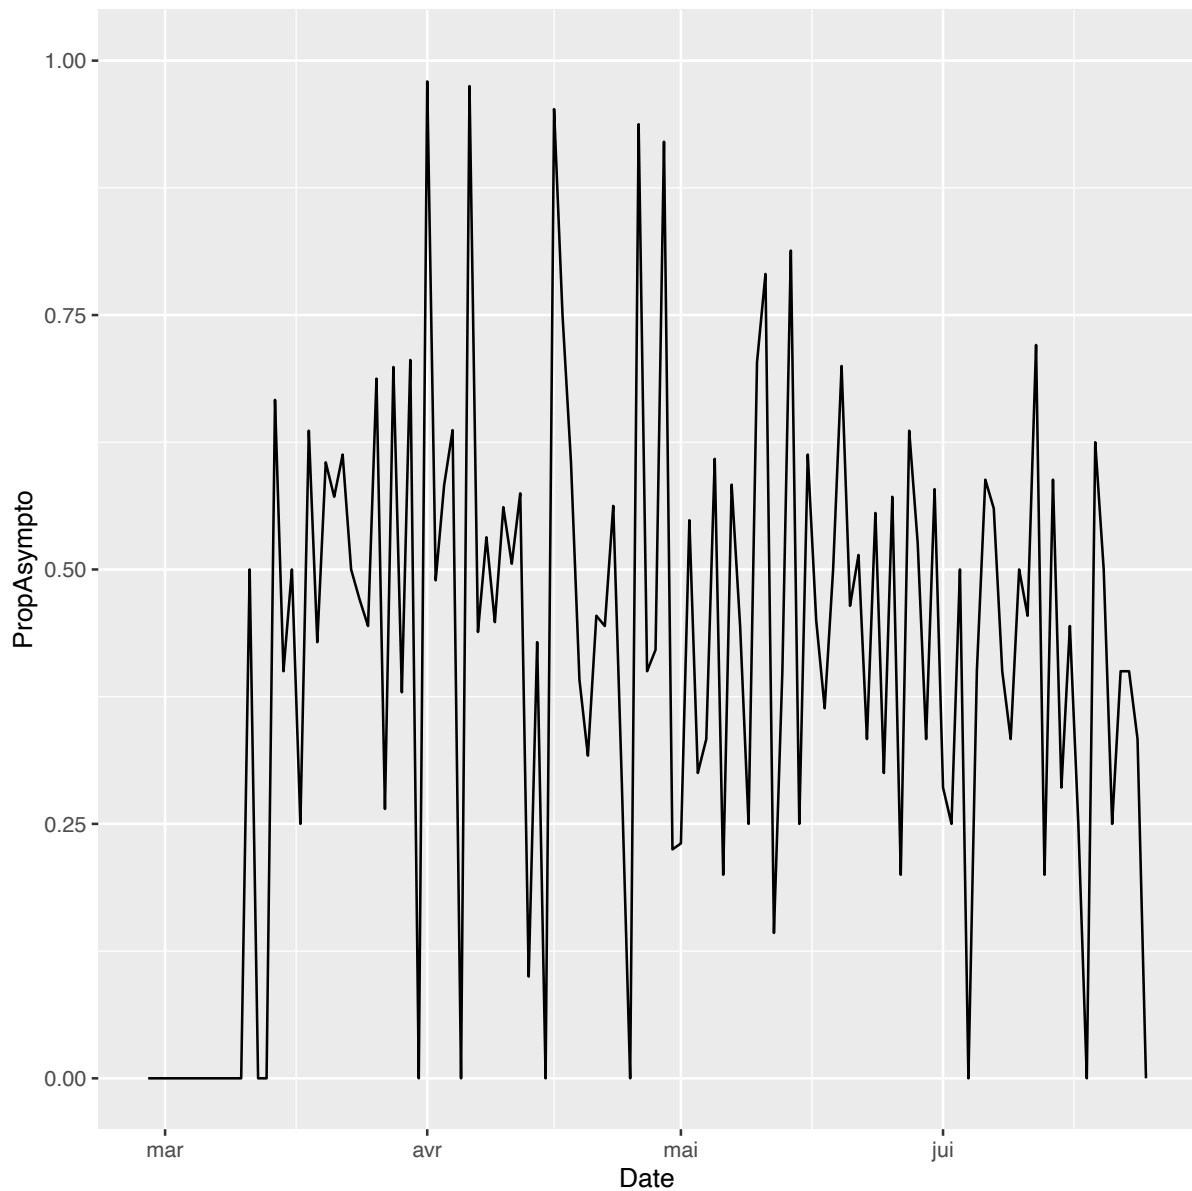

|                                                                                                                                                                                    | X2.5.      | X97.5.    | start | end |
|------------------------------------------------------------------------------------------------------------------------------------------------------------------------------------|------------|-----------|-------|-----|
| <b>MassGather50 MassGatherAll TeleworkingClosures</b>                                                                                                                              | 0.1238981  | 0.370567  | 13    | 18  |
| <b>StayHomeGen ClosDaycare ClosPrim ClosSec ClosHigh MassGather50 MassGatherAll TeleworkingClosures ClosPubAnyPartial</b>                                                          | 0.01284436 | 0.1500129 | 18    | 25  |
| <b>StayHomeGen ClosDaycare ClosPrim ClosSec ClosHigh MassGather50 MassGatherAll MasksVoluntary TeleworkingClosures ClosPubAnyPartial</b>                                           | 0.2525761  | 0.500049  | 25    | 43  |
| <b>StayHomeGen ClosDaycare ClosPrim ClosSec ClosHigh MassGather50 MassGatherAll MasksMandatory TeleworkingClosures ClosPubAnyPartial</b>                                           | 0.6989639  | 0.7843674 | 43    | 80  |
| <b>StayHomeGen MassGather50 MassGatherAll TeleworkingClosures ClosDaycarePartial ClosPrimPartial ClosSecPartial ClosHighPartial ClosPubAnyPartial MasksMandatoryPartial</b>        | 0.4292044  | 0.6910424 | 80    | 95  |
| <b>StayHomeGen MassGather50 TeleworkingClosures ClosDaycarePartial ClosPrimPartial ClosSecPartial ClosHighPartial MassGatherAllPartial ClosPubAnyPartial MasksMandatoryPartial</b> | 0.5308261  | 0.77967   | 95    | 111 |
| <b>MassGather50 MassGatherAllPartial ClosPubAnyPartial</b>                                                                                                                         | 0.6369695  | 0.7813566 | 111   | 119 |

Luxembourg

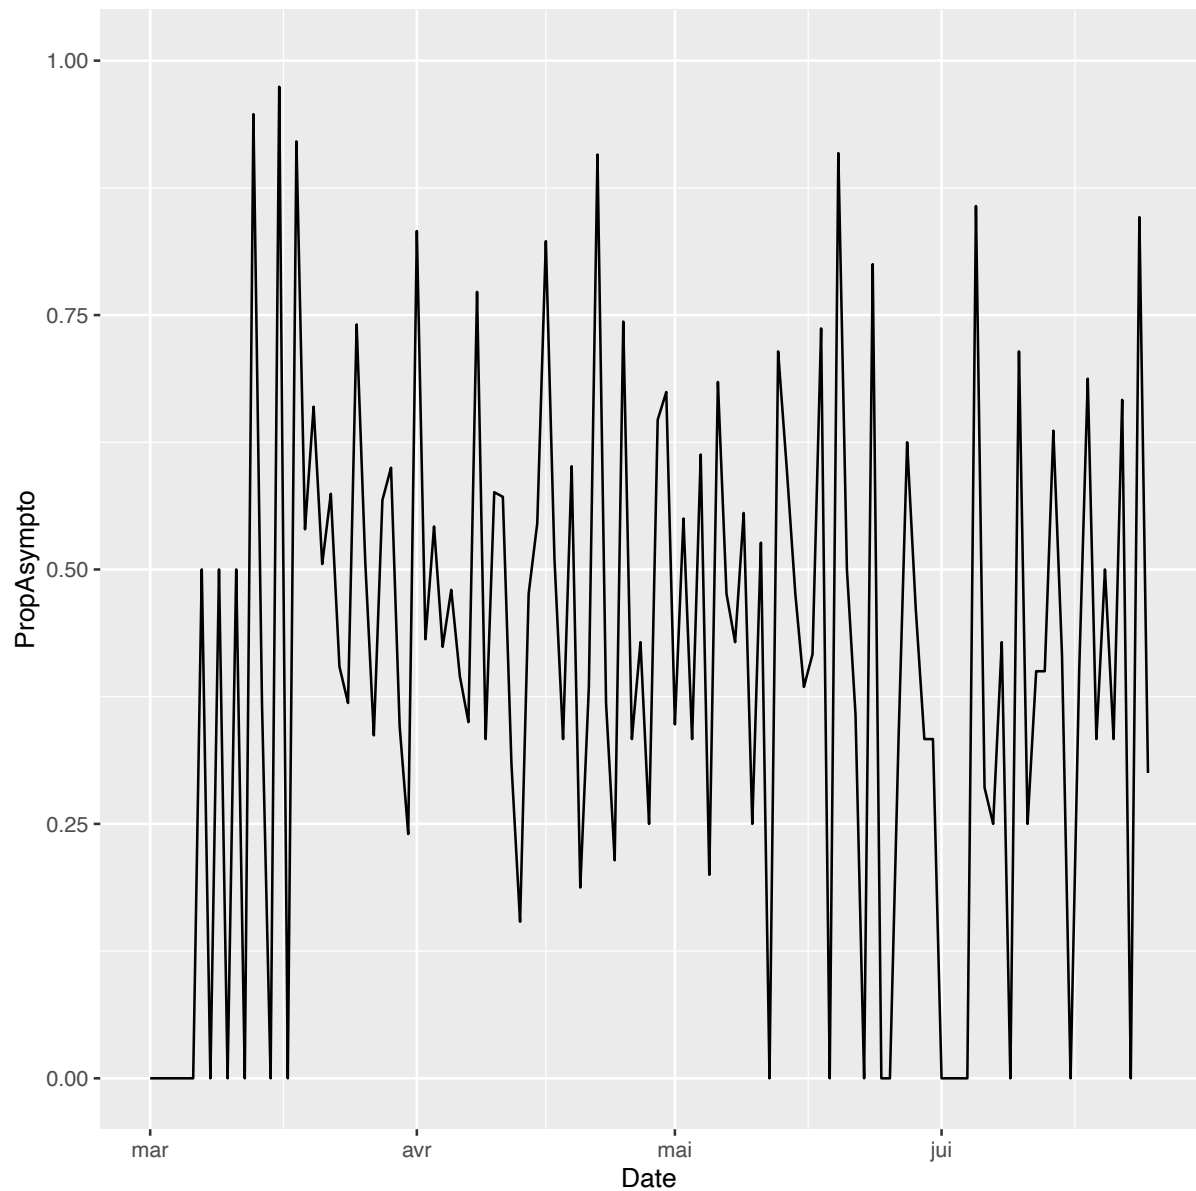

|                                                                                                                                                                         | X2.5.     | X97.5.    | start | end |
|-------------------------------------------------------------------------------------------------------------------------------------------------------------------------|-----------|-----------|-------|-----|
| <b>StayHomeOrder StayHomeRiskG ClosDaycare ClosPrim ClosSec ClosHigh<br/>MassGather50 MassGatherAll ClosPubAny TeleworkingClosures</b>                                  | 0.7803451 | 0.8131901 | 14    | 51  |
| <b>StayHomeRiskG ClosDaycare ClosPrim ClosSec ClosHigh MassGather50<br/>MassGatherAll MasksMandatory TeleworkingClosures<br/>StayHomeOrderPartial ClosPubAnyPartial</b> | 0.8973857 | 0.9698751 | 51    | 66  |
| <b>StayHomeRiskG ClosDaycare ClosPrim ClosSec MassGather50<br/>MassGatherAll MasksMandatory TeleworkingClosures<br/>StayHomeOrderPartial ClosPubAnyPartial</b>          | 0.8696823 | 0.9622252 | 66    | 73  |
| <b>StayHomeRiskG ClosDaycare ClosPrim MassGather50 MassGatherAll<br/>MasksMandatory TeleworkingClosures StayHomeOrderPartial<br/>ClosPubAnyPartial</b>                  | 0.8604145 | 0.9450237 | 73    | 89  |
| <b>StayHomeRiskG MassGather50 MasksMandatory TeleworkingClosures<br/>StayHomeOrderPartial MassGatherAllPartial ClosPubAnyPartial</b>                                    | 0.7330471 | 0.8288629 | 89    | 117 |

Malta

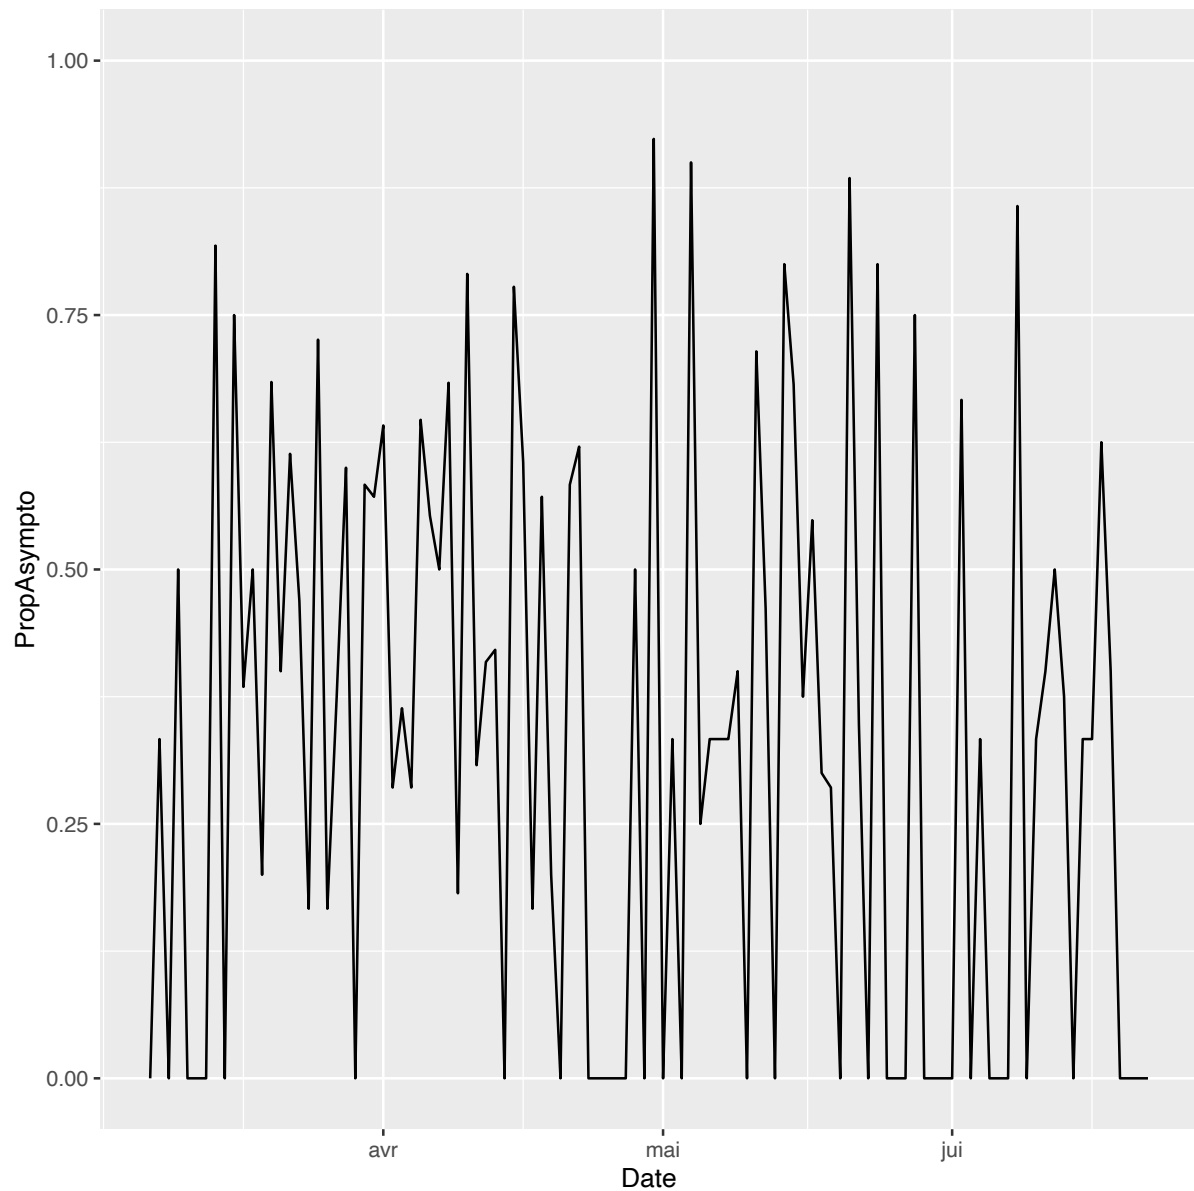

|                                                                                                                                     | X2.5.       | X97.5.       | start | end |
|-------------------------------------------------------------------------------------------------------------------------------------|-------------|--------------|-------|-----|
| ClosDaycare ClosPrim ClosSec ClosHigh MassGather50 MassGatherAll                                                                    | 0.018045864 | 0.3386662    | 7     | 12  |
| ClosDaycare ClosPrim ClosSec ClosHigh MassGather50 MassGatherAll ClosPubAny                                                         | 0.2191913   | 0.4904414    | 12    | 22  |
| StayHomeRiskG ClosDaycare ClosPrim ClosSec ClosHigh MassGather50 MassGatherAll ClosPubAny                                           | 0.7096538   | 0.7753783    | 22    | 63  |
| StayHomeRiskG ClosDaycare ClosPrim ClosSec ClosHigh MassGather50 MassGatherAll ClosPubAny TeleworkingClosures                       | 0.3432446   | 0.6287182825 | 63    | 77  |
| StayHomeRiskG ClosDaycare ClosPrim ClosSec ClosHigh MassGather50 MassGatherAll MasksMandatory TeleworkingClosures ClosPubAnyPartial | 0.6935392   | 0.8358326    | 77    | 108 |

Netherlands

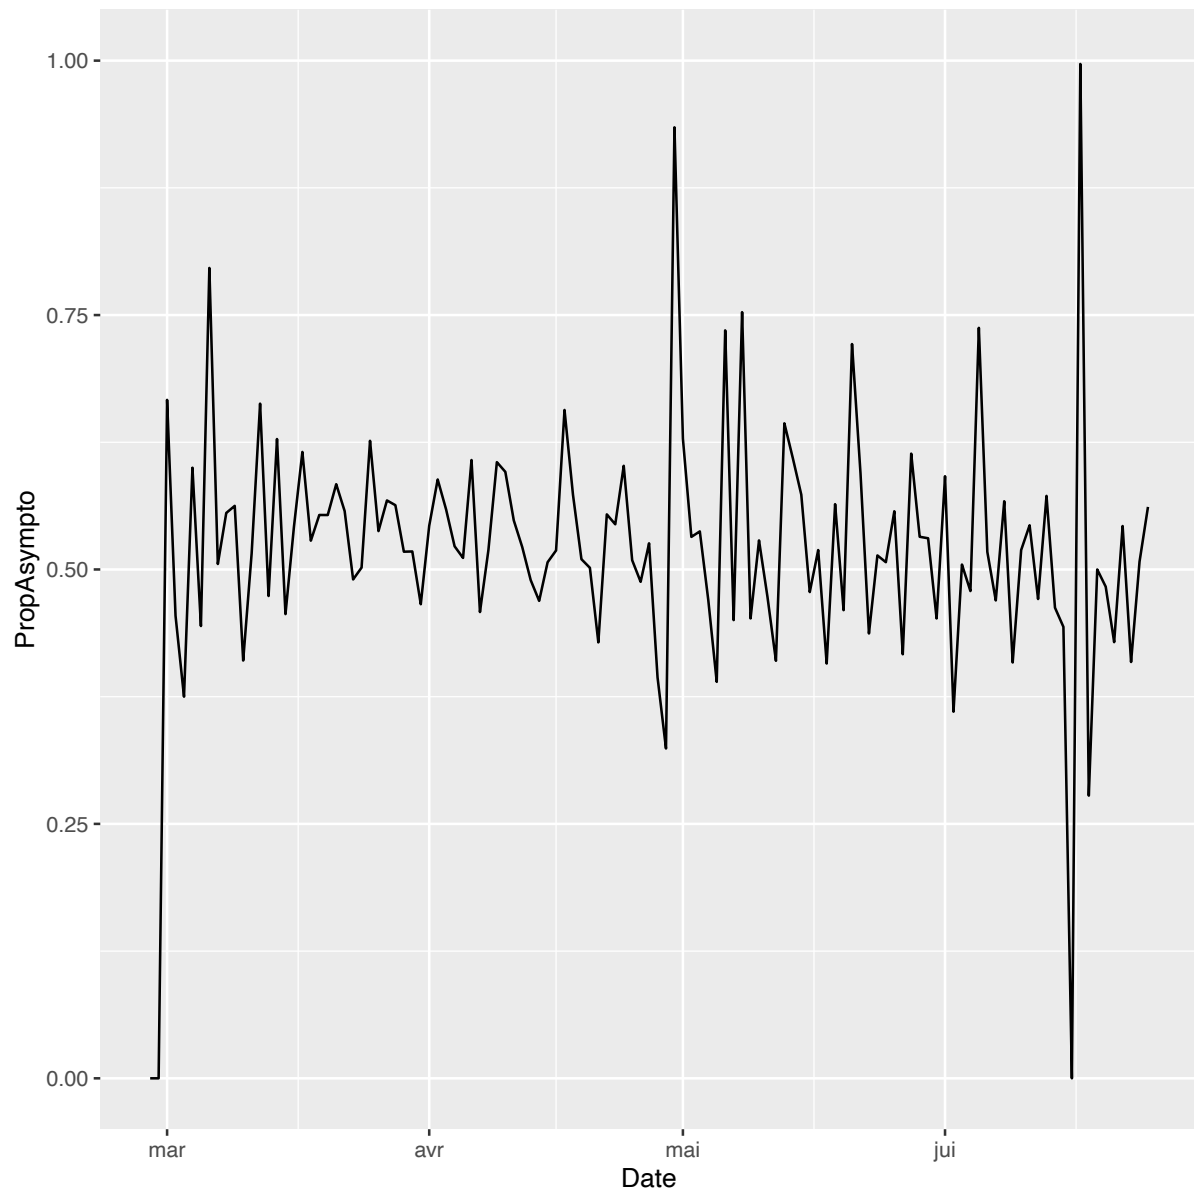

|                                                                                                                                                                       | X2.5.     | X97.5.    | start | end |
|-----------------------------------------------------------------------------------------------------------------------------------------------------------------------|-----------|-----------|-------|-----|
| StayHomeGen StayHomeRiskG ClosDaycare ClosPrim ClosSec ClosHigh<br>MassGatherAll ClosPubAny TeleworkingClosures                                                       | 0.3023738 | 0.3644656 | 17    | 25  |
| StayHomeGen StayHomeRiskG ClosDaycare ClosPrim ClosSec ClosHigh<br>MassGather50 MassGatherAll ClosPubAny TeleworkingClosures                                          | 0.796278  | 0.807539  | 25    | 62  |
| StayHomeGen StayHomeRiskG ClosDaycare ClosPrim ClosSec ClosHigh<br>MassGather50 MassGatherAll TeleworkingClosures ClosPubAnyPartial                                   | 0.8834854 | 0.9188112 | 62    | 74  |
| StayHomeRiskG ClosSec ClosHigh MassGather50 MassGatherAll<br>StayHomeGenPartial ClosDaycarePartial ClosPrimPartial<br>ClosPubAnyPartial TeleworkingClosuresPartial    | 0.8560513 | 0.8895196 | 74    | 96  |
| StayHomeRiskG ClosHigh MassGather50 MassGatherAll MasksMandatory<br>ClosDaycarePartial ClosPrimPartial ClosSecPartial ClosPubAnyPartial<br>TeleworkingClosuresPartial | 0.4813915 | 0.5416514 | 96    | 103 |

|                                                                                                                                                    |           |           |     |     |
|----------------------------------------------------------------------------------------------------------------------------------------------------|-----------|-----------|-----|-----|
| <b>StayHomeRiskG ClosHigh MassGather50 MassGatherAll MasksMandatory<br/>ClosSecPartial ClosPubAnyPartial TeleworkingClosuresPartial</b>            | 0.911537  | 0.9742767 | 103 | 109 |
| <b>StayHomeRiskG MassGather50 MassGatherAll MasksMandatory<br/>ClosSecPartial ClosHighPartial ClosPubAnyPartial<br/>TeleworkingClosuresPartial</b> | 0.7812089 | 0.8392733 | 109 | 119 |



Norway

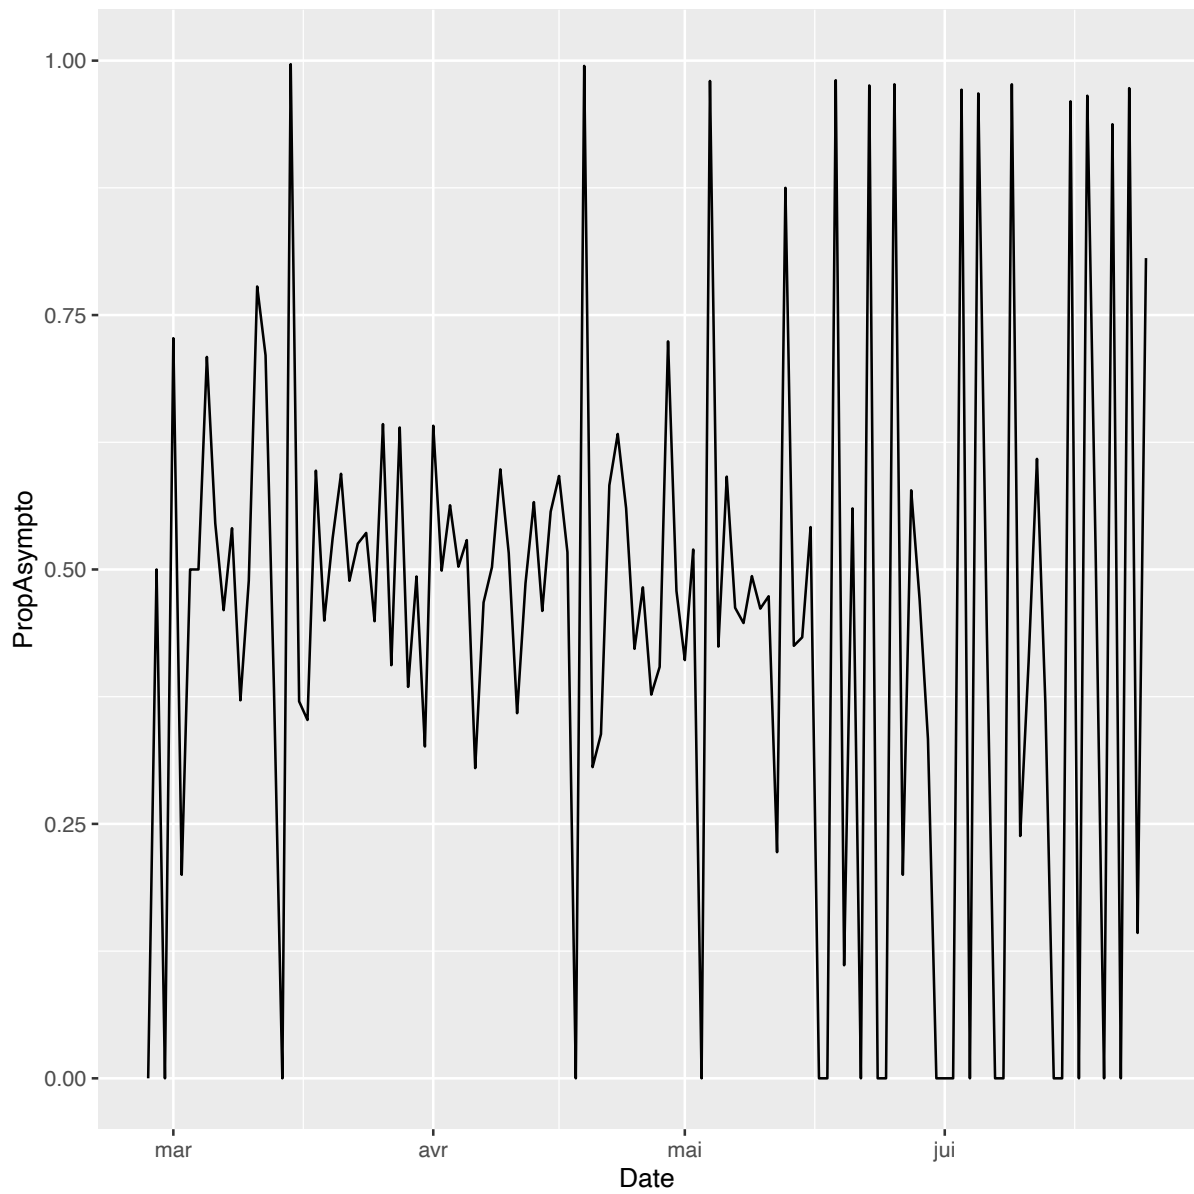

|                                                                                                                  | X2.5.     | X97.5.     | start | end |
|------------------------------------------------------------------------------------------------------------------|-----------|------------|-------|-----|
| StayHomeRiskG ClosDaycare ClosPrim ClosSec ClosHigh MassGather50<br>MassGatherAll ClosPubAny TeleworkingClosures | 0.8252971 | 0.8462632  | 14    | 56  |
| StayHomeRiskG ClosPrim ClosSec ClosHigh MassGather50<br>MassGatherAll ClosPubAny TeleworkingClosures             | 0.846834  | 0.9273084  | 56    | 62  |
| StayHomeRiskG ClosSec MassGather50 MassGatherAll ClosPubAny<br>TeleworkingClosures                               | 0.9031467 | 0.9496044  | 62    | 80  |
| StayHomeRiskG MassGather50 MassGatherAll ClosPubAny<br>TeleworkingClosures                                       | 0.8324623 | 0.8910454  | 80    | 96  |
| StayHomeRiskG MassGather50 MassGatherAll TeleworkingClosures<br>ClosPubAnyPartial                                | 0.8234758 | 0.85952806 | 96    | 120 |

Poland

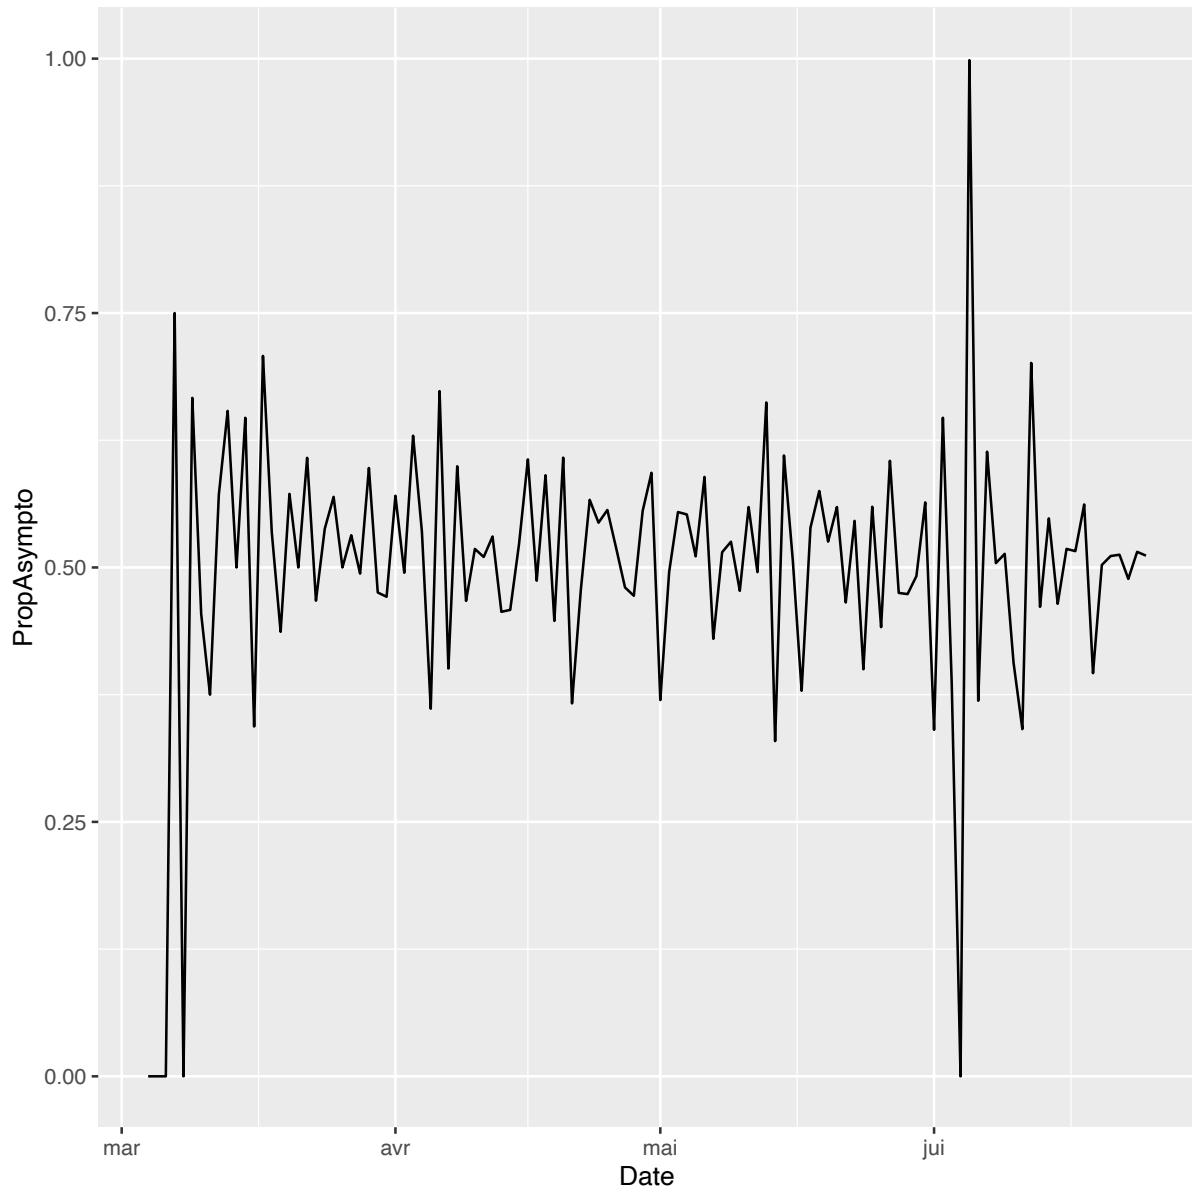

|                                                                                                                                                                | X2.5.     | X97.5.    | start | end |
|----------------------------------------------------------------------------------------------------------------------------------------------------------------|-----------|-----------|-------|-----|
| StayHomeGen StayHomeRiskG ClosDaycare ClosPrim ClosSec ClosHigh<br>MassGather50 MassGatherAll ClosPubAny TeleworkingClosures                                   | 0.1259545 | 0.3029861 | 9     | 21  |
| StayHomeOrder StayHomeRiskG ClosDaycare ClosPrim ClosSec<br>ClosHigh MassGather50 MassGatherAll ClosPubAny<br>TeleworkingClosures                              | 0.6326851 | 0.7162403 | 21    | 47  |
| StayHomeGen StayHomeRiskG ClosDaycare ClosPrim ClosSec ClosHigh<br>MassGather50 MassGatherAll ClosPubAny MasksMandatory<br>TeleworkingClosures                 | 0.748349  | 0.7975115 | 47    | 64  |
| StayHomeGen StayHomeRiskG ClosPrim ClosSec ClosHigh<br>MassGather50 MassGatherAll MasksMandatory TeleworkingClosures<br>ClosPubAnyPartial                      | 0.6415664 | 0.7899979 | 64    | 83  |
| StayHomeGen StayHomeRiskG MassGather50 MassGatherAll<br>MasksMandatory TeleworkingClosures ClosPrimPartial ClosSecPartial<br>ClosHighPartial ClosPubAnyPartial | 0.738371  | 0.7964129 | 83    | 88  |

|                                                                                                                                                                                         |           |           |     |     |
|-----------------------------------------------------------------------------------------------------------------------------------------------------------------------------------------|-----------|-----------|-----|-----|
| <b>StayHomeGen StayHomeRiskG MassGather50 MassGatherAll<br/> TeleworkingClosures ClosPrimPartial ClosSecPartial ClosHighPartial<br/> ClosPubAnyPartial MasksMandatoryPartial</b>        | 0.5503947 | 0.7858148 | 88  | 108 |
| <b>StayHomeGen StayHomeRiskG MassGather50 TeleworkingClosures<br/> ClosPrimPartial ClosSecPartial ClosHighPartial MassGatherAllPartial<br/> ClosPubAnyPartial MasksMandatoryPartial</b> | 0.7351467 | 0.7966436 | 108 | 114 |

*Portugal*

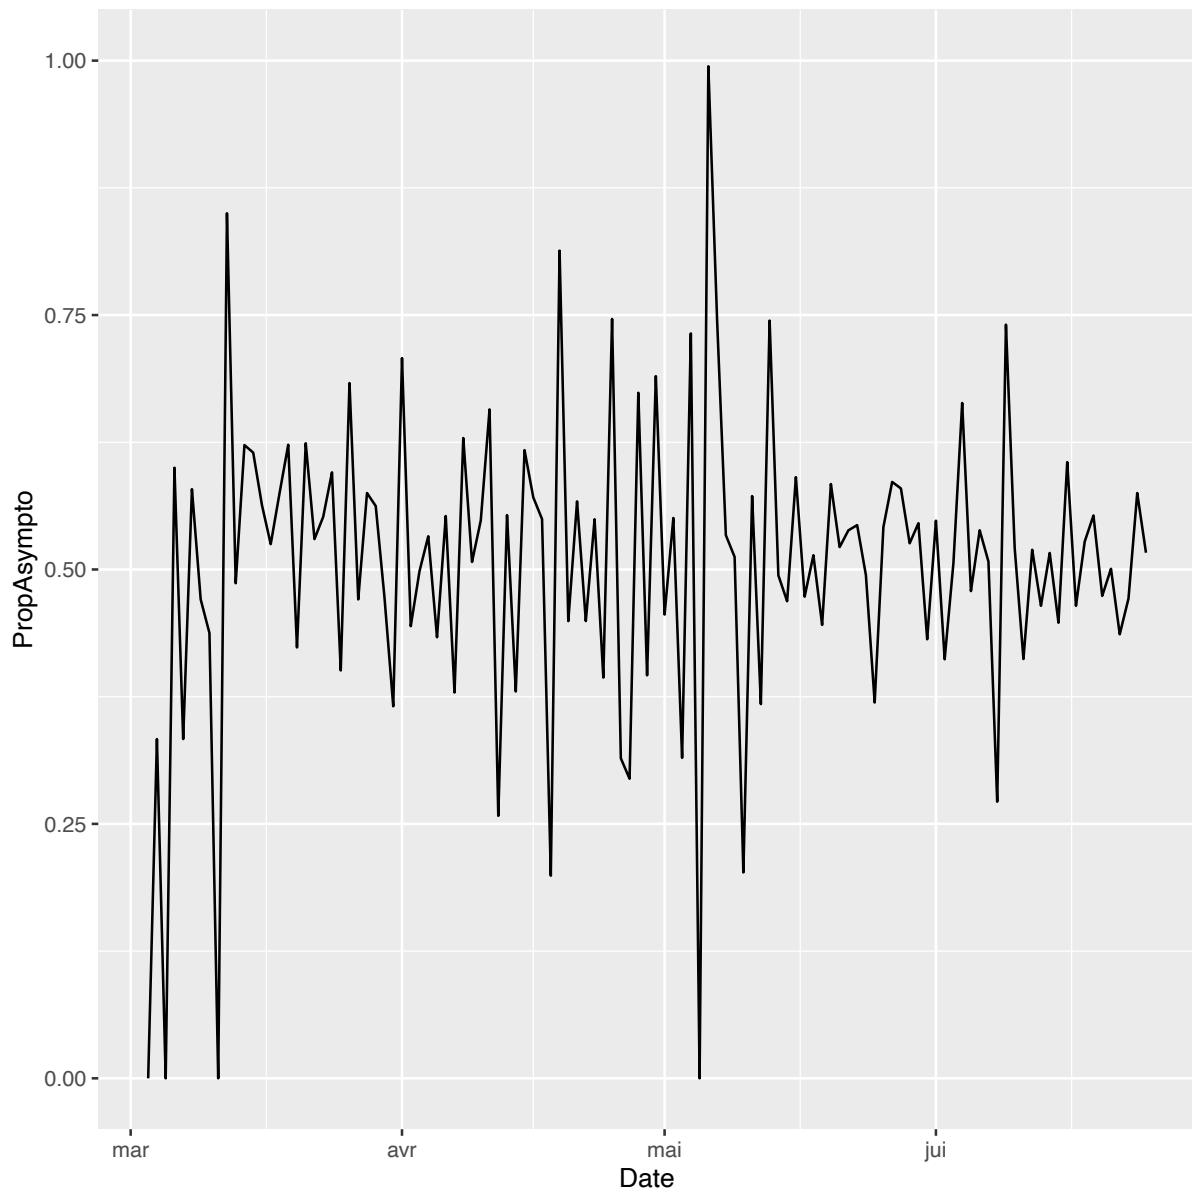

|                                                                                                                                                         | X2.5.        | X97.5.            | start | end |
|---------------------------------------------------------------------------------------------------------------------------------------------------------|--------------|-------------------|-------|-----|
| StayHomeGen StayHomeRiskG ClosDaycare ClosPrim ClosSec ClosHigh MassGatherAll ClosPubAny TeleworkingClosures                                            | 0.8443021    | 0.8594764         | 13    | 63  |
| StayHomeGen StayHomeRiskG ClosDaycare ClosPrim ClosSec ClosHigh MassGatherAll MasksMandatory TeleworkingClosures ClosPubAnyPartial                      | 0.9278661225 | 0.9523058         | 63    | 78  |
| StayHomeGen StayHomeRiskG ClosPrim MassGatherAll MasksMandatory TeleworkingClosures ClosDaycarePartial ClosSecPartial ClosHighPartial ClosPubAnyPartial | 0.8360596    | 0.891424922499999 | 78    | 91  |
| StayHomeGen StayHomeRiskG ClosPrim MassGatherAll MasksMandatory ClosSecPartial ClosHighPartial ClosPubAnyPartial TeleworkingClosuresPartial             | 0.8301179    | 0.8900867         | 91    | 115 |

Romania

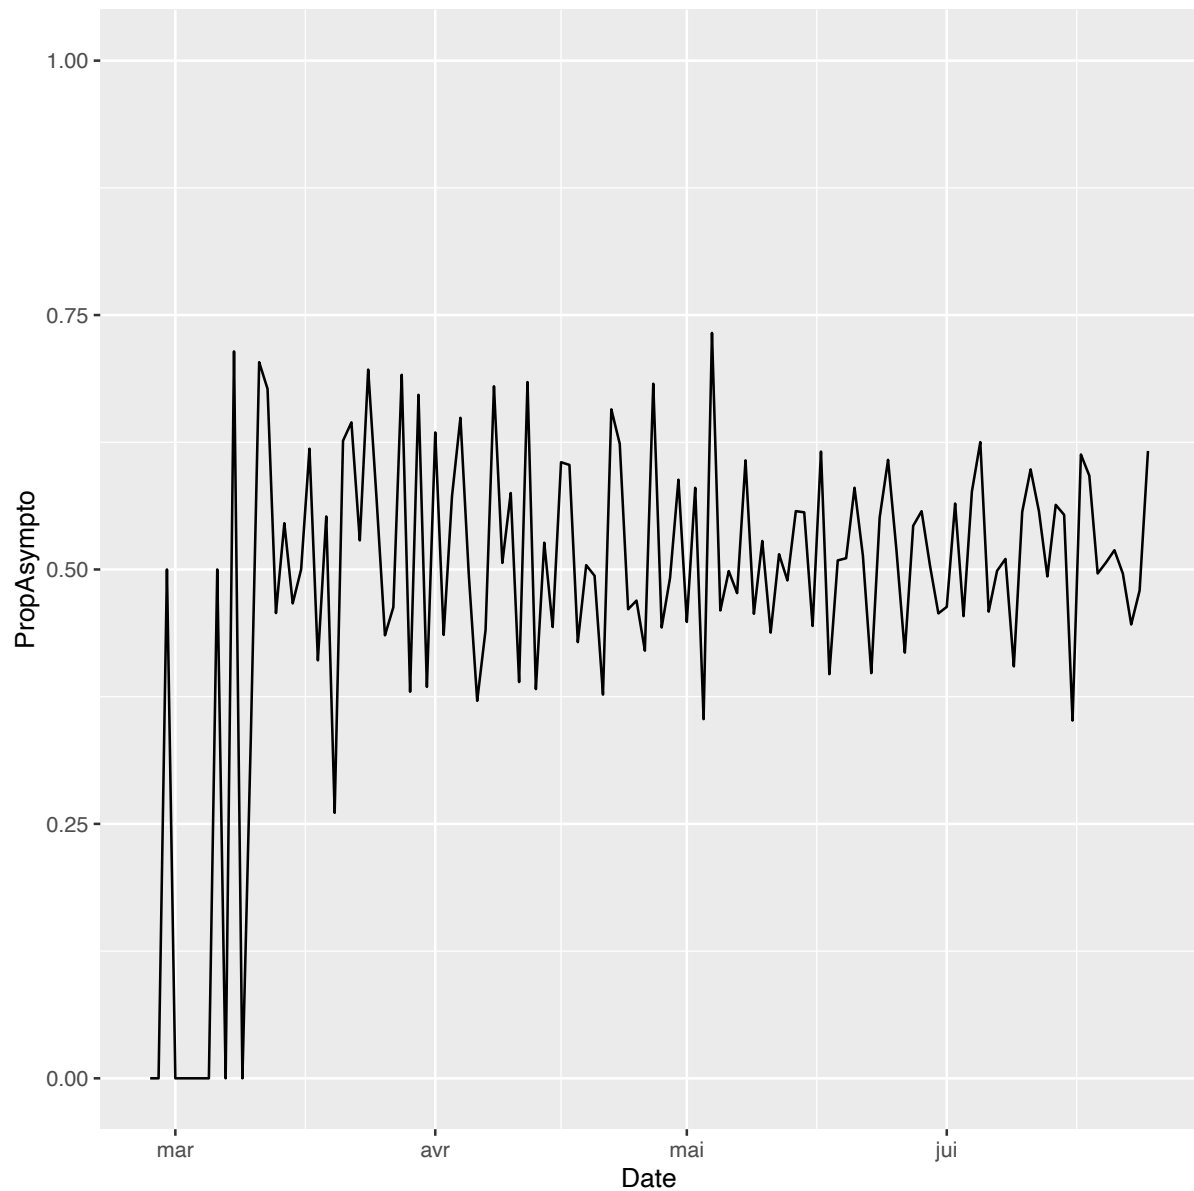

|                                                                                                                                                   | X2.5.       | X97.5.    | start | end |
|---------------------------------------------------------------------------------------------------------------------------------------------------|-------------|-----------|-------|-----|
| ClosDaycare ClosPrim ClosSec ClosHigh MassGatherAll ClosPubAny TeleworkingClosures                                                                | 0.009951189 | 0.2541608 | 20    | 27  |
| StayHomeOrder StayHomeRiskG ClosDaycare ClosPrim ClosSec ClosHigh MassGather50 MassGatherAll ClosPubAny TeleworkingClosures                       | 0.6321739   | 0.6855128 | 27    | 79  |
| ClosDaycare ClosPrim ClosSec ClosHigh MassGather50 MassGatherAll MasksMandatory StayHomeOrderPartial ClosPubAnyPartial TeleworkingClosuresPartial | 0.772315955 | 0.8462748 | 79    | 96  |
| ClosDaycare ClosHigh MassGather50 MasksMandatory ClosPrimPartial ClosSecPartial MassGatherAllPartial ClosPubAnyPartial TeleworkingClosuresPartial | 0.5044271   | 0.6770979 | 96    | 109 |
| ClosHigh MassGather50 MasksMandatory ClosDaycarePartial MassGatherAllPartial ClosPubAnyPartial TeleworkingClosuresPartial                         | 0.5446644   | 0.7563876 | 109   | 120 |

Slovakia

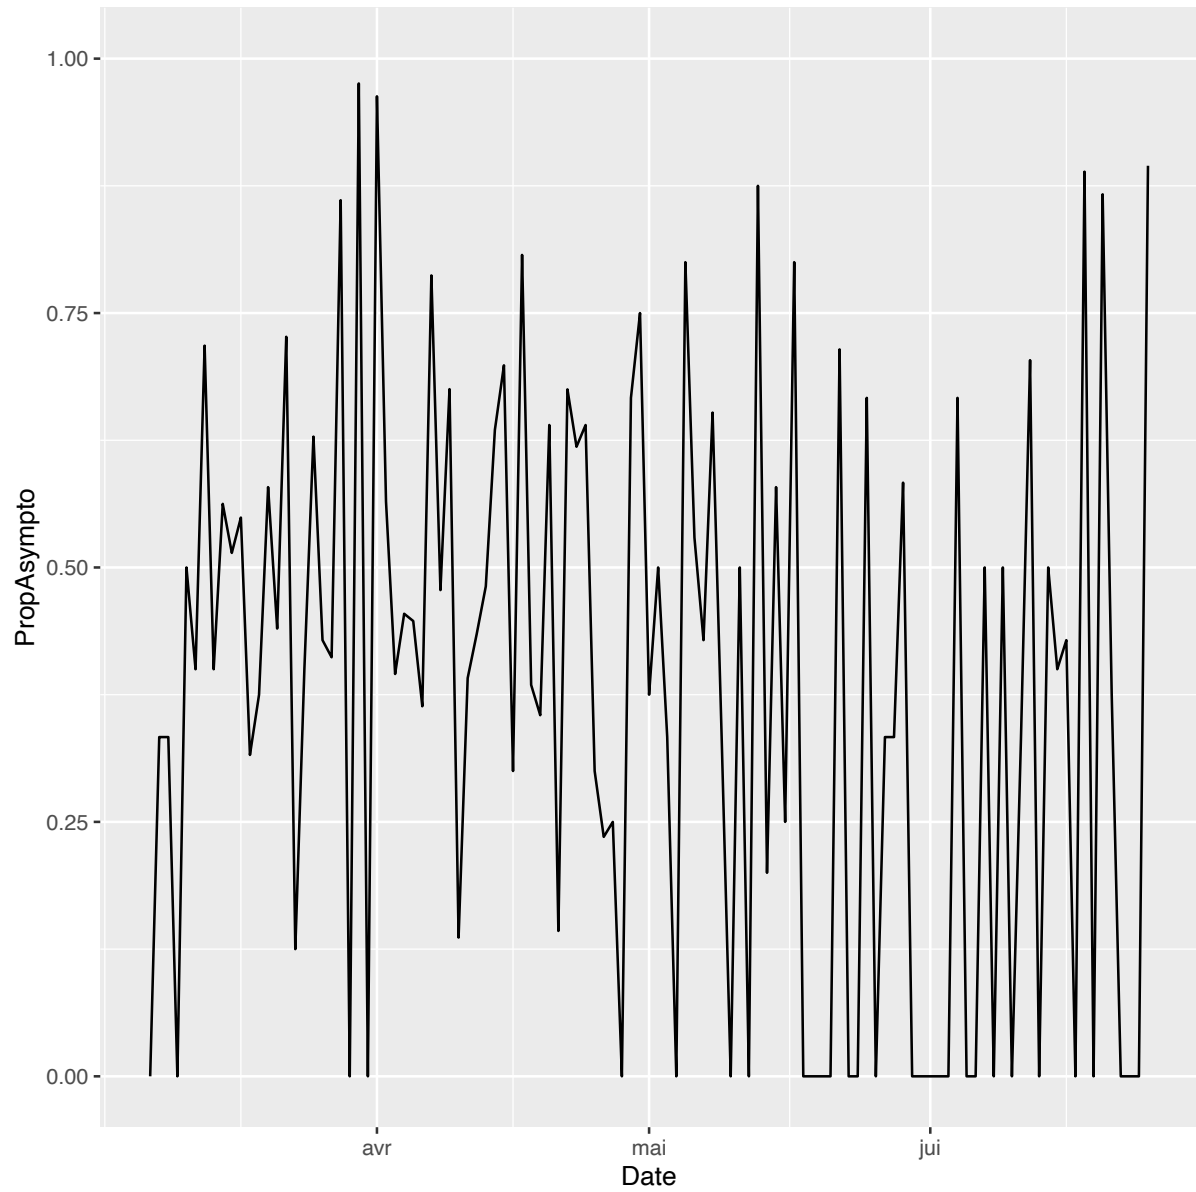

|                                                                                                          | X2.5.     | X97.5.       | start | end |
|----------------------------------------------------------------------------------------------------------|-----------|--------------|-------|-----|
| <b>ClosDaycare ClosPrim ClosSec ClosHigh MassGather50 MassGatherAll MasksMandatory</b>                   | 0.2053861 | 0.6879962    | 5     | 10  |
| <b>ClosDaycare ClosPrim ClosSec ClosHigh MassGather50 MassGatherAll ClosPubAny MasksMandatory</b>        | 0.6875873 | 0.7426919    | 10    | 46  |
| <b>ClosDaycare ClosPrim ClosSec ClosHigh MassGather50 MassGatherAll ClosPubAny MasksMandatoryPartial</b> | 0.9294588 | 0.9639461    | 46    | 76  |
| <b>ClosDaycare ClosPrim ClosSec ClosHigh MassGather50 MassGatherAll MasksMandatoryPartial</b>            | 0.656925  | 0.9073934    | 76    | 83  |
| <b>ClosDaycare ClosPrim ClosSec ClosHigh MassGatherAll MasksMandatoryPartial</b>                         | 0.860407  | 0.9770033025 | 83    | 88  |
| <b>ClosHigh MassGatherAll MasksMandatoryPartial</b>                                                      | 0.4038897 | 0.604122     | 88    | 97  |
| <b>ClosHigh MasksMandatoryPartial</b>                                                                    | 0.5889562 | 0.8950053    | 97    | 111 |

Slovenia

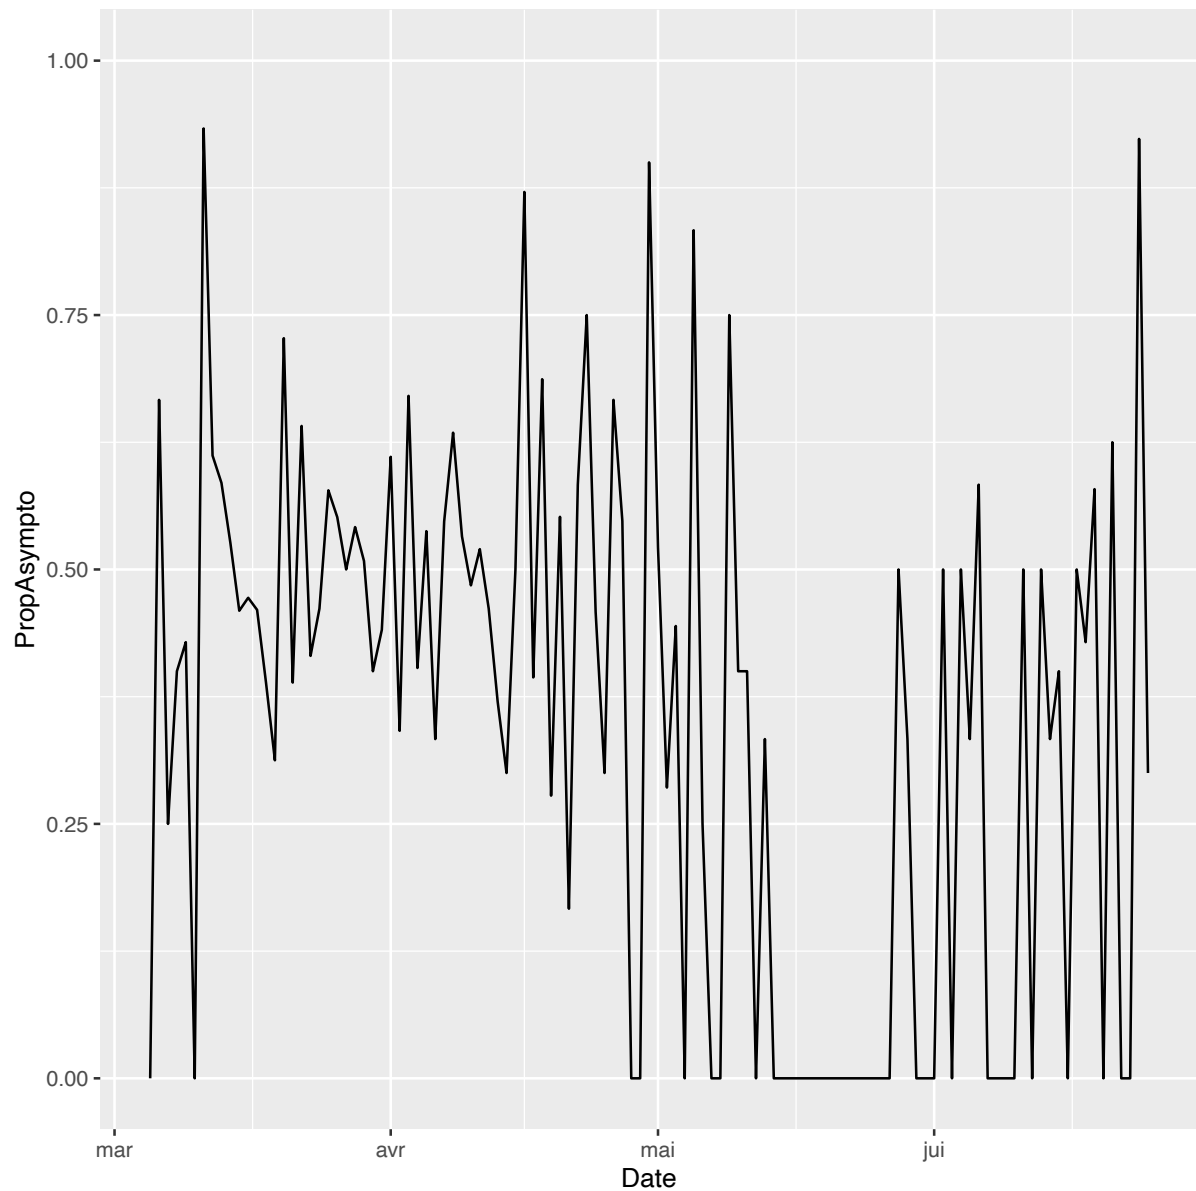

|                                                                                                                                            | X2.5.     | X97.5.      | start | end |
|--------------------------------------------------------------------------------------------------------------------------------------------|-----------|-------------|-------|-----|
| <b>ClosDaycare ClosPrim ClosSec ClosHigh MassGatherAll ClosPubAny TeleworkingClosures</b>                                                  | 0.79386   | 0.8768214   | 10    | 15  |
| <b>StayHomeOrder ClosDaycare ClosPrim ClosSec ClosHigh MassGather50 MassGatherAll ClosPubAny TeleworkingClosures</b>                       | 0.6603907 | 0.7049614   | 15    | 26  |
| <b>StayHomeOrder ClosDaycare ClosPrim ClosSec ClosHigh MassGather50 MassGatherAll ClosPubAny MasksMandatory TeleworkingClosures</b>        | 0.8737763 | 0.8877829   | 26    | 56  |
| <b>StayHomeOrder ClosDaycare ClosPrim ClosSec ClosHigh MassGather50 MassGatherAll MasksMandatory TeleworkingClosures ClosPubAnyPartial</b> | 0.9626257 | 0.9997295   | 56    | 62  |
| <b>ClosDaycare ClosPrim ClosSec ClosHigh MassGather50 MassGatherAll MasksMandatory TeleworkingClosures ClosPubAnyPartial</b>               | 0.9088207 | 0.9250516   | 62    | 76  |
| <b>ClosSec ClosHigh MassGather50 MassGatherAll MasksMandatory TeleworkingClosures ClosPrimPartial ClosPubAnyPartial</b>                    | 0.8226635 | 0.8949225   | 76    | 90  |
| <b>ClosHigh MassGatherAll MasksMandatory TeleworkingClosures ClosSecPartial ClosPubAnyPartial</b>                                          | 0.6779962 | 0.699916405 | 90    | 103 |

|                                                                                                                    |           |           |     |     |
|--------------------------------------------------------------------------------------------------------------------|-----------|-----------|-----|-----|
| <b>ClosHigh MassGather50 MassGatherAll MasksMandatory<br/>TeleworkingClosures ClosSecPartial ClosPubAnyPartial</b> | 0.5995159 | 0.7531111 | 103 | 113 |
|--------------------------------------------------------------------------------------------------------------------|-----------|-----------|-----|-----|



Spain

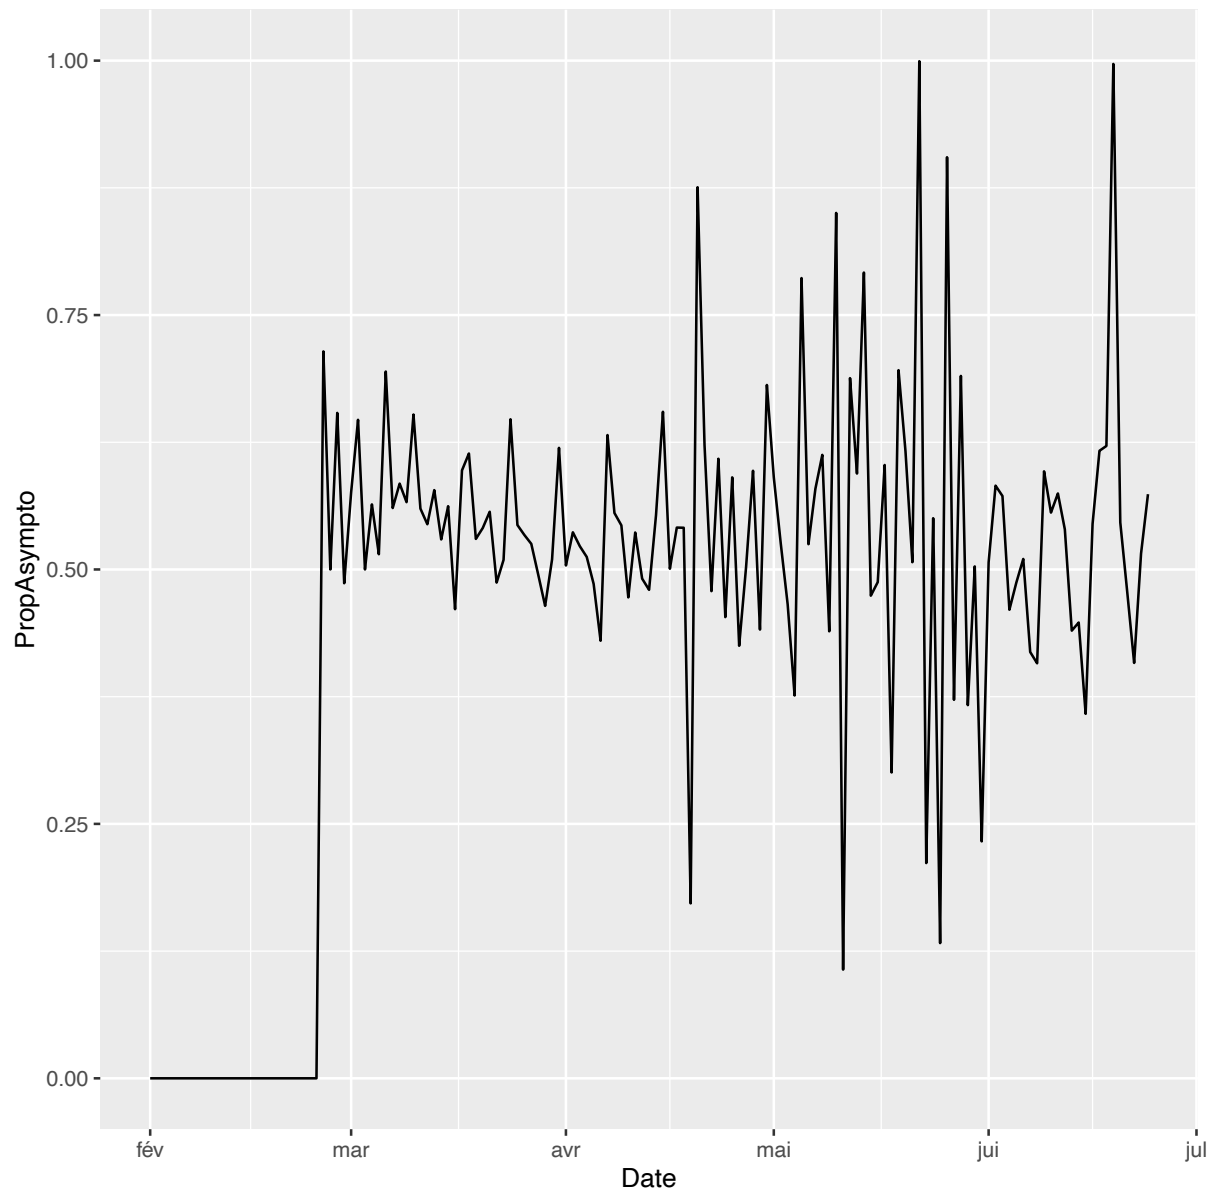

|                                                                                                                                                   | X2.5.      | X97.5.    | start | end |
|---------------------------------------------------------------------------------------------------------------------------------------------------|------------|-----------|-------|-----|
| StayHomeOrder StayHomeRiskG ClosDaycare ClosPrim ClosSec ClosHigh MassGather50 MassGatherAll ClosPubAny MasksVoluntary TeleworkingClosures        | 0.08377592 | 0.1387723 | 41    | 56  |
| StayHomeOrder ClosDaycare ClosPrim ClosSec ClosHigh MassGather50 MassGatherAll ClosPubAny MasksVoluntary TeleworkingClosures                      | 0.6503117  | 0.7131595 | 56    | 73  |
| StayHomeOrder ClosDaycare ClosPrim ClosSec ClosHigh MassGather50 MassGatherAll ClosPubAny MasksVoluntary TeleworkingClosuresPartial               | 0.7706428  | 0.8218033 | 73    | 94  |
| ClosDaycare ClosPrim ClosSec ClosHigh MassGather50 MassGatherAll MasksVoluntary StayHomeOrderPartial ClosPubAnyPartial TeleworkingClosuresPartial | 0.4769607  | 0.5646038 | 94    | 102 |
| ClosDaycare ClosPrim ClosSec ClosHigh MassGather50 MassGatherAll MasksVoluntary ClosPubAnyPartial TeleworkingClosuresPartial                      | 0.7236511  | 0.7667341 | 102   | 145 |

Sweden

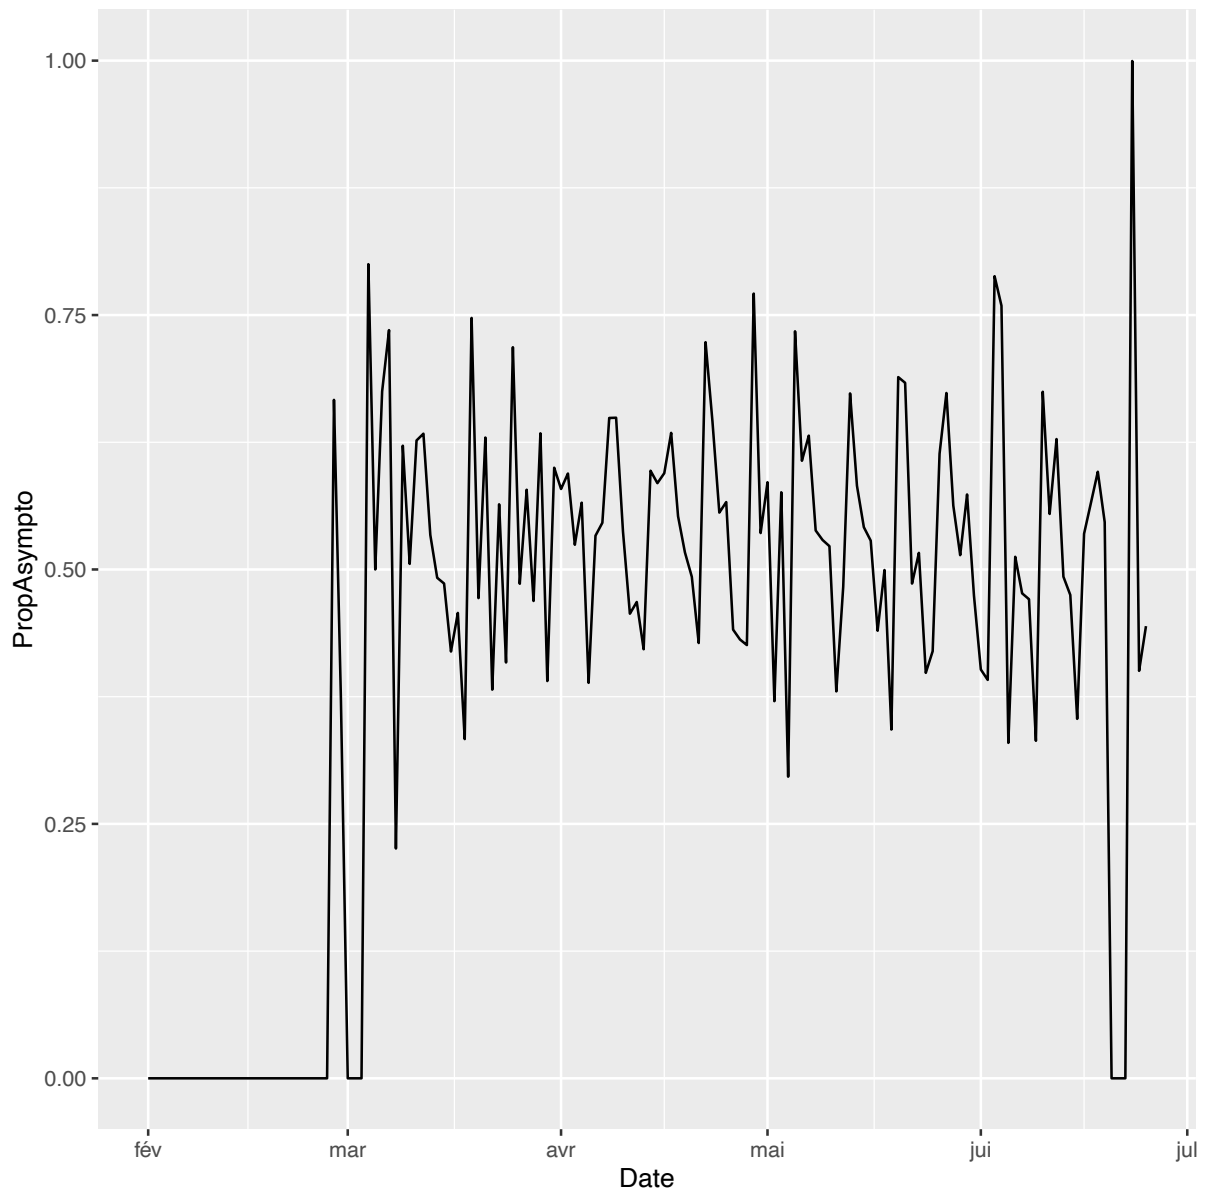

|                                                                                      | X2.5.     | X97.5.    | start | end |
|--------------------------------------------------------------------------------------|-----------|-----------|-------|-----|
| <b>MassGatherAll</b>                                                                 | 0.1337678 | 0.4438668 | 42    | 47  |
| <b>StayHomeRiskG ClosSec ClosHigh MassGatherAll TeleworkingClosures</b>              | 0.3588259 | 0.4842545 | 47    | 58  |
| <b>StayHomeRiskG ClosSec ClosHigh MassGather50 MassGatherAll TeleworkingClosures</b> | 0.3821429 | 0.5404523 | 58    | 137 |
| <b>StayHomeRiskG MassGather50 MassGatherAll TeleworkingClosures</b>                  | 0.4602255 | 0.8174852 | 137   | 146 |

Switzerland

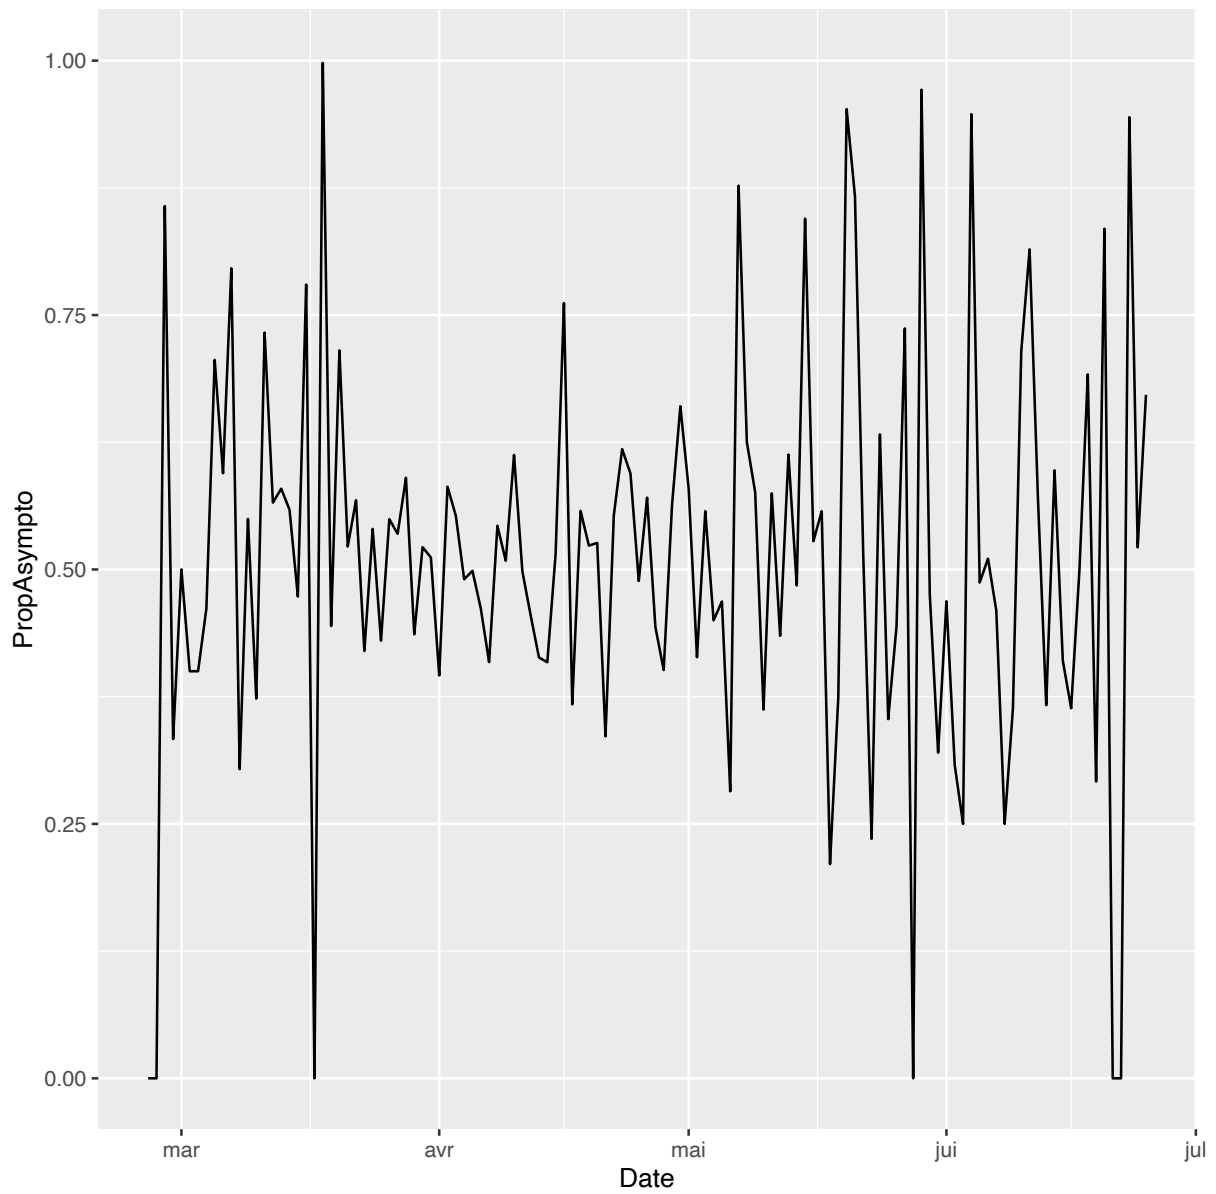

|                                                                                                                                 | X2.5.     | X97.5.    | start | end |
|---------------------------------------------------------------------------------------------------------------------------------|-----------|-----------|-------|-----|
| StayHomeGen StayHomeRiskG ClosPrim ClosSec ClosHigh MassGather50<br>MassGatherAll ClosPubAny MasksVoluntary TeleworkingClosures | 0.8439518 | 0.869     | 23    | 77  |
| StayHomeGen StayHomeRiskG ClosHigh MassGather50 MassGatherAll<br>MasksVoluntary TeleworkingClosures ClosPubAnyPartial           | 0.9422403 | 0.9631619 | 77    | 103 |
| StayHomeGen StayHomeRiskG MassGatherAll MasksVoluntary<br>TeleworkingClosures                                                   | 0.3335817 | 0.4544721 | 103   | 121 |

United Kingdom

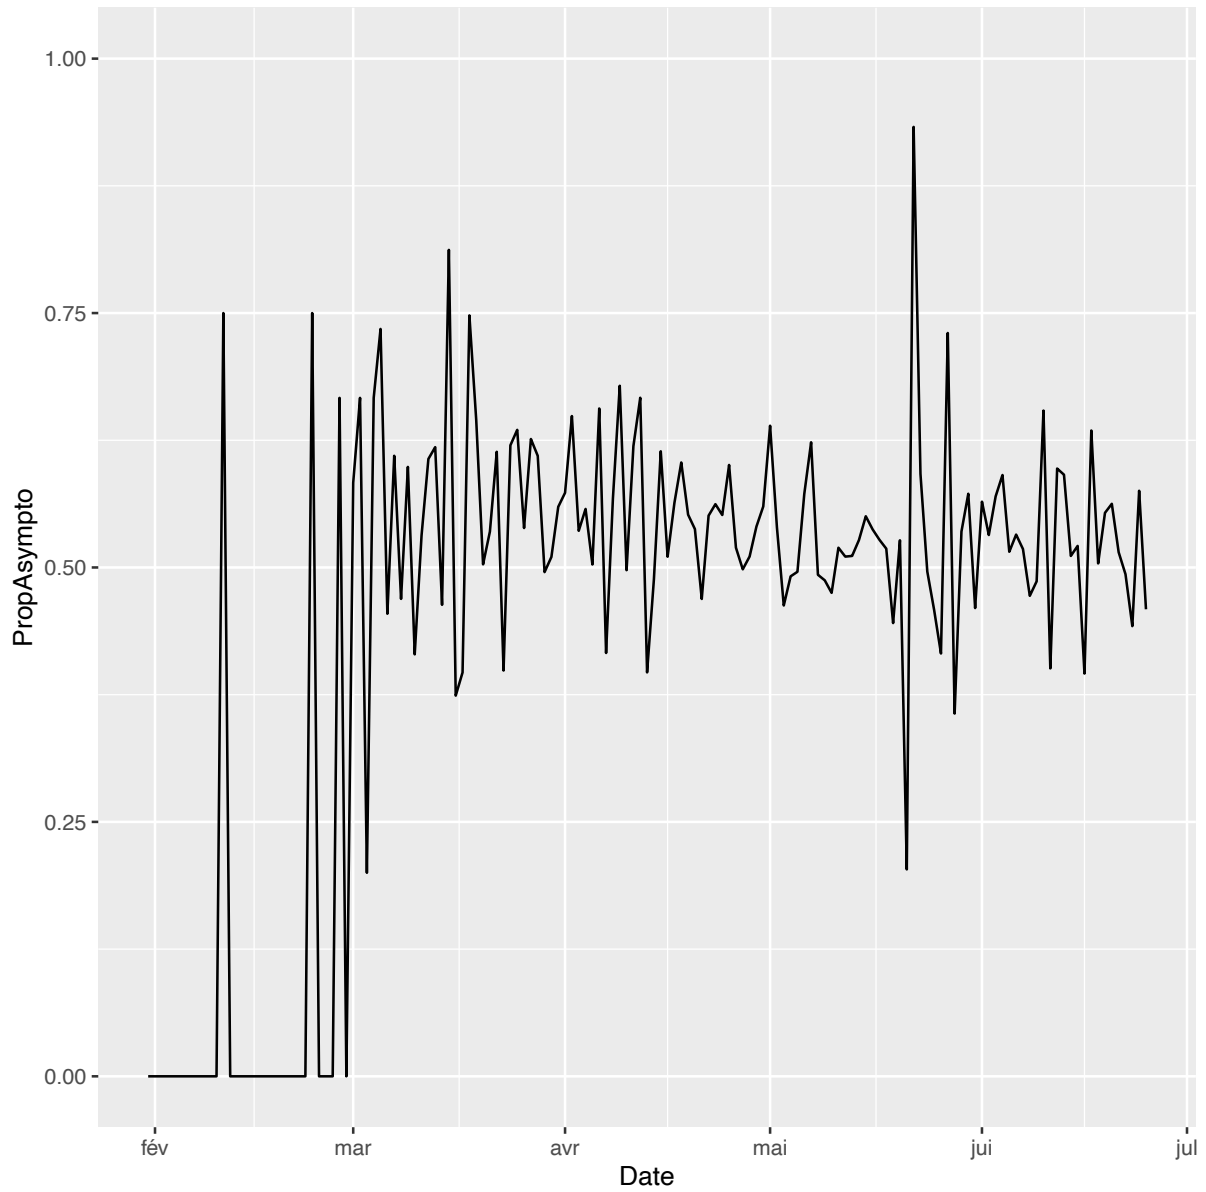

|                                                                                                                                                              | X2.5.     | X97.5.    | start | end |
|--------------------------------------------------------------------------------------------------------------------------------------------------------------|-----------|-----------|-------|-----|
| StayHomeGen StayHomeRiskG ClosPubAny TeleworkingClosures                                                                                                     | 0.5264001 | 0.9781395 | 46    | 54  |
| StayHomeOrder StayHomeRiskG ClosDaycare ClosPrim ClosSec<br>MassGather50 MassGatherAll ClosPubAny TeleworkingClosures                                        | 0.552725  | 0.7625485 | 54    | 101 |
| StayHomeRiskG ClosDaycare ClosPrim ClosSec MassGather50<br>MassGatherAll StayHomeOrderPartial ClosPubAnyPartial<br>TeleworkingClosuresPartial                | 0.7593525 | 0.9160936 | 101   | 131 |
| StayHomeRiskG ClosDaycare ClosPrim ClosSec MassGather50<br>MassGatherAll MasksVoluntary StayHomeOrderPartial ClosPubAnyPartial<br>TeleworkingClosuresPartial | 0.5794221 | 0.9273528 | 131   | 147 |
